# Supplementary material for: Examining patient distress and unmet need for support across UK renal units with varying models of psychosocial care delivery: a cross-sectional survey study
Source: PubMed Central journal article supplement — BMJ Open. 2020 Sep 17;10(9):e036931. doi: 10.1136/bmjopen-2020-036931 (PMC7500306; doi:10.1136/bmjopen-2020-036931), 2020-09-17
Supplement: bmjopen-2020-036931.draft_revisions.pdf [file bmjopen-2020-036931.draft_revisions.pdf]

# BMJ Open

BMJ Open is committed to open peer review. As part of this commitment we make the peer review history of every article we publish publicly available.

When an article is published we post the peer reviewers' comments and the authors' responses online. We also post the versions of the paper that were used during peer review. These are the versions that the peer review comments apply to.

The versions of the paper that follow are the versions that were submitted during the peer review process. They are not the versions of record or the final published versions. They should not be cited or distributed as the published version of this manuscript.

BMJ Open is an open access journal and the full, final, typeset and author-corrected version of record of the manuscript is available on our site with no access controls, subscription charges or pay-per-view fees (<http://bmjopen.bmj.com>).

If you have any questions on BMJ Open's open peer review process please email [info.bmjopen@bmj.com](mailto:info.bmjopen@bmj.com)

# BMJ Open

## EXAMINING PATIENT DISTRESS AND UNMET NEED FOR SUPPORT ACROSS UK RENAL UNITS WITH VARYING MODELS OF PSYCHOSOCIAL CARE DELIVERY: A CROSS-SECTIONAL SURVEY STUDY.

|                               |                                                                                                                                                                                                                                                                                     |
|-------------------------------|-------------------------------------------------------------------------------------------------------------------------------------------------------------------------------------------------------------------------------------------------------------------------------------|
| Journal:                      | <i>BMJ Open</i>                                                                                                                                                                                                                                                                     |
| Manuscript ID                 | bmjopen-2020-036931                                                                                                                                                                                                                                                                 |
| Article Type:                 | Original research                                                                                                                                                                                                                                                                   |
| Date Submitted by the Author: | 10-Jan-2020                                                                                                                                                                                                                                                                         |
| Complete List of Authors:     | Seekles, Maaïke; University of Salford, School of Health and Society<br>Ormandy, Paula; University of Salford School of Health and Society,<br>School of Health and Society<br>Kamerāde, Daiga; University of Salford School of Health and Society,<br>School of Health and Society |
| Keywords:                     | Organisation of health services < HEALTH SERVICES ADMINISTRATION & MANAGEMENT, Nephrology < INTERNAL MEDICINE, MENTAL HEALTH, Dialysis < NEPHROLOGY, Depression & mood disorders < PSYCHIATRY, SOCIAL MEDICINE                                                                      |
|                               |                                                                                                                                                                                                                                                                                     |

SCHOLARONE™  
Manuscripts

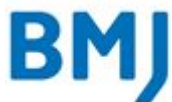

I, the Submitting Author has the right to grant and does grant on behalf of all authors of the Work (as defined in the below author licence), an exclusive licence and/or a non-exclusive licence for contributions from authors who are: i) UK Crown employees; ii) where BMJ has agreed a CC-BY licence shall apply, and/or iii) in accordance with the terms applicable for US Federal Government officers or employees acting as part of their official duties; on a worldwide, perpetual, irrevocable, royalty-free basis to BMJ Publishing Group Ltd ("BMJ") its licensees and where the relevant Journal is co-owned by BMJ to the co-owners of the Journal, to publish the Work in this journal and any other BMJ products and to exploit all rights, as set out in our [licence](#).

The Submitting Author accepts and understands that any supply made under these terms is made by BMJ to the Submitting Author unless you are acting as an employee on behalf of your employer or a postgraduate student of an affiliated institution which is paying any applicable article publishing charge ("APC") for Open Access articles. Where the Submitting Author wishes to make the Work available on an Open Access basis (and intends to pay the relevant APC), the terms of reuse of such Open Access shall be governed by a Creative Commons licence – details of these licences and which [Creative Commons](#) licence will apply to this Work are set out in our licence referred to above.

Other than as permitted in any relevant BMJ Author's Self Archiving Policies, I confirm this Work has not been accepted for publication elsewhere, is not being considered for publication elsewhere and does not duplicate material already published. I confirm all authors consent to publication of this Work and authorise the granting of this licence.

1  
2  
3  
4  
5  
6  
7  
8  
9  
10  
11  
12  
13  
14  
15  
16  
17  
18  
19  
20  
21  
22  
23  
24  
25  
26  
27  
28  
29  
30  
31  
32  
33  
34  
35  
36  
37  
38  
39  
40  
41  
42  
43  
44  
45  
46  
47  
48  
49  
50  
51  
52  
53  
54  
55  
56  
57  
58  
59  
60

**EXAMINING PATIENT DISTRESS AND UNMET NEED FOR SUPPORT ACROSS UK RENAL  
UNITS WITH VARYING MODELS OF PSYCHOSOCIAL CARE DELIVERY: A CROSS-SECTIONAL  
SURVEY STUDY.**

**AUTHORS**

**Maaïke L. Seekles (corresponding author):** T: +44(0) 0161 295 0396, E:

M.L.Seekles1@salford.ac.uk, A: School of Health and Society, University of Salford, Room  
L530, Allerton Building, Salford, M66PU, UK

**Professor Paula Ormandy:** School of Health and Society, University of Salford, Manchester,  
UK.

**Dr. Daiga Kamerāde:** Reader, School of Health and Society, University of Salford,  
Manchester, UK.

**WORD COUNT**

3829 words

## ABSTRACT

### Objective

To examine in-centre haemodialysis (ICHD) patients' emotional distress and perceived need for support across UK renal units with varying models of psychosocial service provision.

### Design

The study used a cross-sectional survey design. Univariate and multivariate logistic regression were used to examine patient distress, as captured by the Distress Thermometer, and need for support, across different renal units.

### Setting

Seven renal units across England, Wales and Scotland. The units were purposively selected so that varying workforce models of renal psychosocial services were represented.

### Participants

In total, 752 patients were on dialysis in the participating centres on the days of data collection. All adult patients, who could understand English, and with capacity (as determined by the nurse in charge), were eligible to participate in the study. The questionnaire was completed by 509 patients, resulting in an overall response rate of 67.7%.

### Outcome measures

The prevalence of distress and patient reported need for support.

### Results

48.9% (95% Confidence Interval (CI): 44.5 – 53.4) of respondents were categorised as experiencing distress. A significant association between distress and models of renal psychosocial service provision was found ( $\chi^2(6)=15.05$ ,  $p = .019$ ). Multivariate logistic regression showed that patients in units with higher total psychosocial staffing ratios [odds ratio (OR) 0.65 (95% CI 0.47-0.89);  $p=0.008$ ] and specifically higher social work ratios [OR 0.49 (95% CI 0.33-0.74;  $p=0.001$ ) are less likely to experience distress, even after controlling for demographic variables. In addition, a higher patient-reported unmet need for support was

1  
2  
3 found in units where psychosocial staffing numbers are low or non-existent ( $\chi^2(6) = 37.80$ ,  
4  $p < 0.0001$ ).  
5  
6

## 7 **Conclusions**

8  
9  
10 The novel findings emphasise a need for increased incorporation of dedicated renal  
11 psychosocial staff into the renal care pathway. Importantly, these members of staff should be  
12 able to offer support for psychological as well as practical and social care related issues.  
13  
14  
15

## 16 **KEY WORDS**

17  
18  
19 Nephrology, Psychosocial Support Systems, Interdisciplinary Health Team, Psychological  
20 distress, Health Workforce, Chronic Disease  
21  
22  
23  
24  
25  
26  
27  
28  
29

## 30 **STRENGTHS AND LIMITATIONS OF THIS STUDY**

- 31  
32
- 33 • This study is the first to investigate distress in renal patients across varying models of  
34 psychosocial service delivery, providing a unique health systems research perspective.
  - 35 • This is a cross-sectional study, since a longitudinal panel study was not possible for  
36 practical reasons.
  - 37 • Those from black and minority ethnic groups were under-represented in the  
38 responses.
  - 39 • The overall response rate was high, which increases the probability that the findings  
40 are representative of the patients in participating units.  
41  
42  
43  
44  
45  
46  
47  
48  
49  
50  
51  
52  
53  
54  
55  
56  
57  
58  
59  
60

## INTRODUCTION

Chronic Kidney Disease (CKD) is a worldwide public health problem, with increasing incidence and prevalence, high costs, and poor outcomes<sup>1</sup>. The disease is typically progressive and can be divided into five stages of increasing severity, with treatments based on these stages. For a small, but significant percentage of people, CKD progresses to End-Stage Renal Disease (ESRD). At this stage, which is irreversible, the kidneys are no longer able to function and renal replacement therapy (RRT) – dialysis or transplantation – becomes necessary to maintain life<sup>2,3</sup>. People with CKD often have a range of comorbid disorders. Some of these, such as hypertension and diabetes, are risk factors of the disease. Others, such as heart failure or chronic pulmonary disease, are often co-prevalent as a result of CKD or because of shared risk factors<sup>4,5</sup>. Living with CKD, and especially ESRD, provides many ongoing physical, emotional, financial and/or social challenges throughout a patient's renal journey. These consequences of the disease and its comorbidities make patient access to expertise in medical, nursing, dietetic, pharmacological, psychological and social areas essential<sup>6</sup>.

In recent years, against a global backdrop of shortages in the nephrology workforce, there have been increasing calls for a change in the existing models of renal care to manage the demands of an increasing CKD burden. A collaborative care model, in which a greater share of the work is performed by allied health professionals (including psychosocial staff) is one of the proposed solutions<sup>7</sup>. Acceptance that a focus on the psychosocial needs of the patients should be included in comprehensive psychosocial care has grown in recent years<sup>8</sup>, yet this has not always translated into practice. Internationally, limited evidence suggests differences in the level and type of renal psychosocial care accessible to patients. A recent Europe-wide study found that multidisciplinary teams (defined as teams consisting of allied health professionals, e.g. expert nurses, dieticians and social workers) were routinely available to patients with CKD in only eight out of 17 studied countries<sup>9</sup>. In the US and Australia, renal dedicated social workers appear to be the point-person responsible for providing psychosocial care, although in both countries high caseloads and exceeded benchmarks were reported<sup>10-12</sup>. US renal social workers are in a special position, since ESRD is the only disease

1  
2  
3 for which Medicare's Conditions for Coverage Mandate requires a Masters-level trained social  
4 worker on every interdisciplinary team<sup>13</sup>. A recent workforce report by Seekles et al.<sup>14</sup> showed  
5 that in the UK, over the past 15 years, a change in renal psychosocial staffing levels had taken  
6 place. The number of (bachelor-level trained) renal social workers had reduced dramatically,  
7 whilst renal psychologists and counsellors had grown in numbers. In the UK too,  
8 recommended staff-to-patient ratios were far from being met. A general UK renal  
9 psychosocial service provision model was lacking: most renal units incorporated different  
10 psychosocial teams, made up of varying types and numbers of staff, while some units  
11 completely lacked any form of dedicated psychosocial support<sup>15</sup>.

21 Currently, UK guidelines from the National Health Service (NHS) England<sup>16</sup> and the National  
22 Institute for Health and Care Excellence (NICE)<sup>3</sup> vaguely state that haemodialysis (HD) patients  
23 'must have access to' psychosocial services, without clarifying the type and number of staff  
24 that should be accessible. This, and the large variety in models of service provision found,  
25 reflects a lack of empirical studies on the delivery of psychosocial services that can inform  
26 evidence-based staffing standards and regulations. This paper presents the findings of an  
27 investigation that used the concept of distress – broadly defined as 'a multifactorial  
28 unpleasant experience of a psychological (i.e., cognitive, behavioural, emotional), social,  
29 spiritual, and/or physical nature'<sup>17</sup> – to explore the association between in-centre  
30 haemodialysis (ICHHD) patient distress, their perceived need for support and UK models of  
31 renal psychosocial service delivery. Studies have found that distress can have a negative effect  
32 on quality of life, health outcomes and costs, emphasising the importance of addressing  
33 psychosocial issues in renal patients<sup>18–20</sup>. The research question asked whether there is a  
34 relationship between different UK models of renal psychosocial service delivery, self-reported  
35 distress and need for support of ICHD patients. This investigation forms part of a larger,  
36 nationwide mixed-methods study that aims to understand how renal psychosocial services  
37 are delivered in the UK.

## 53 **METHODS**

### 56 **Participating renal units**

58 The study used a cross-sectional survey design and included in-centre haemodialysis (ICHHD)  
59 patients from seven main renal units across England (n=3), Wales (n=2) and Scotland (n=2).



1  
2  
3 The sites were purposively selected out of a total of 89 renal units, informed by the outcomes  
4 of a recent renal psychosocial workforce mapping<sup>14</sup>, to ensure an inclusion of different  
5 staffing ratios and models of psychosocial service provision. Ratios were calculated using the  
6 number of ICHD patients from the latest UK Renal Registry<sup>21</sup>. Whilst many members of  
7 psychosocial staff cover the whole range of RRT patients, including transplant patients, this  
8 number was most appropriate since it links directly to the study population. Throughout this  
9 paper, the units have been sorted based on their psychosocial staff-to-ICHD patient ratios,  
10 with unit A having no renal dedicated psychosocial staff available and unit G having the best  
11 ratio of staff available to its patients. Patients in in unit B have access to psychology services  
12 only, whereas patients in unit C have access to a counsellor and welfare advisor. Patients in  
13 units D, E, F and G have access to a social worker, in combination with either a psychologist,  
14 counsellor or psychiatrist.

15  
16 On average, ratios of renal dedicated psychosocial staffing in the study sites are better than  
17 ratios found across the UK. The average ratio of psychologists in this study is 1 Full-Time  
18 Equivalent (FTE) per 248 dialysis patients, compared to an average of 1 FTE per 1044 patients.  
19 For social workers, the average ratio in this study is 1 FTE per 156 dialysis patients, compared  
20 to 1 FTE per 355 patients across the UK<sup>14</sup>. Comparison of overall staffing ratios was not  
21 possible due to a lack of comparable data. Furthermore, only units B and D had a black and  
22 minority ethnic (BME) population of a similar size as the overall UK dialysis population, whilst  
23 the other units served predominantly or completely white populations.

### 24 25 26 **Patients and public involvement**

27 The study design was developed with input from patient representatives, who were asked to  
28 comment on the appropriateness of the outcome measures and provide insight into the  
29 expected burden and time required for participation. Patients were not involved in the  
30 recruitment or further conduct of the study. The results will be disseminated to participants  
31 and the wider renal units through Kidney Care UK's (KCUK) marketing channels (website,  
32 posters) at the end of the project.

### 33 34 35 **Participants and recruitment**

36 All adult ICHD patients who could understand English, and with capacity (as determined by  
37 the nurse in charge), were eligible to participate in the study. Data collection took place  
38  
39  
40  
41  
42  
43  
44  
45  
46  
47  
48  
49  
50  
51  
52  
53  
54  
55  
56  
57  
58  
59  
60

between March 2018 and July 2019. Renal unit staff at each Trust provided all eligible patients with a letter of invitation and an information sheet. The University research team would visit the unit one week later to distribute the questionnaires (with information sheets), which were to be completed by patients whilst on dialysis. Consent was assumed upon return of the completed questionnaire. To prevent selection bias, patients were allowed help with completion of the questionnaire.

### Sample

The sample size was restricted by the number of patients dialysing in the renal units. In total, 752 patients were on dialysis in the participating centres on the days of data collection. Of these, 509 completed the questionnaire, resulting in an overall response rate of 67.7%. The response rates in participating units varied from 49.0% to 82.0%.

As can be seen in Table 1 **Error! Reference source not found.**, the majority of respondents were male and aged over 70 years old. This distribution of gender is similar to the general UK ICHD population, which is reported to consist for 61.9% of males. The median age of the general ICHD population is 67.5 years<sup>21</sup>. The study sample was almost entirely made up of people from the white ethnic group, which is different from the total ICHD population, in which this group makes up around 70 percent of patients <sup>21</sup>. Furthermore, the majority of patients had been on dialysis for 6 months to three years, lived together with their partner or family and was retired.

Four respondents did not complete the DT, whilst others did not provide information on other questions, leading to varying numbers of missing data. Instead of using listwise deletion, which would have resulted in the loss of important information on some analyses, pairwise deletion was used to maximise the available data on an analysis by analysis basis.

Table 1: Respondent characteristics and proportion per sub-group

| Characteristic                        | N   | %    |
|---------------------------------------|-----|------|
| Total                                 | 509 | 100  |
| <i>Main unit (psychosocial model)</i> |     |      |
| Unit A (no staff)                     | 64  | 12.6 |
| Unit B (psychology)                   | 65  | 12.8 |
| Unit C (counselling + welfare advise) | 98  | 19.3 |

|                                                 |     |      |
|-------------------------------------------------|-----|------|
| Unit D (social work + psychology + counselling) | 73  | 14.3 |
| Unit E (social work + psychiatry)               | 104 | 20.4 |
| Unit F (social work + psychology)               | 47  | 9.3  |
| Unit G (social work + psychology)               | 58  | 11.4 |
| <i>Sex</i>                                      |     |      |
| Male                                            | 311 | 61.1 |
| Female                                          | 192 | 37.7 |
| Missing                                         | 6   | 1.2  |
| <i>Age Category</i>                             |     |      |
| 18-39                                           | 50  | 9.8  |
| 40-49                                           | 51  | 10.0 |
| 50-59                                           | 97  | 19.1 |
| 60-69                                           | 104 | 20.4 |
| ≥70                                             | 201 | 39.5 |
| Missing                                         | 6   | 1.2  |
| <i>Ethnicity</i>                                |     |      |
| White                                           | 460 | 90.4 |
| Other                                           | 42  | 8.3  |
| Missing                                         | 7   | 1.4  |
| <i>Time on Dialysis</i>                         |     |      |
| <6 months                                       | 87  | 17.1 |
| 6 months to 3 years                             | 193 | 37.9 |
| 3 to 5 years                                    | 91  | 17.9 |
| >5 years                                        | 130 | 25.5 |
| Missing                                         | 8   | 1.6  |
| <i>Living situation</i>                         |     |      |
| Living alone                                    | 147 | 29.7 |
| Living together                                 | 349 | 70.3 |
| Missing                                         | 13  | 2.6  |
| <i>Employment situation</i>                     |     |      |
| Employed                                        | 67  | 13.2 |

|                |     |      |
|----------------|-----|------|
| Unemployed     | 14  | 2.8  |
| Unable to work | 183 | 36.0 |
| Retired        | 237 | 46.6 |
| Missing        | 8   | 1.6  |

### Ethical approval

Ethical approval was obtained from the University of Salford Ethics Committee, the West of Scotland Research Ethics Service and Health Research Authority in October 2017 (Ref 17/WS/0185). In addition, all Research and Development offices from the participating Trusts approved the study and confirmed their capability and capacity to host the research.

### Measurements

The questionnaire used the NCCN Distress Thermometer (DT) and Problems Checklist<sup>17</sup> as the instrument to measure distress. Although initially developed to screen for distress in oncology patients, the DT has been validated for use in the UK renal population<sup>22</sup>. It is a simple one-item screening tool, designed to be part of health professionals' daily practice, which asks patients to rate their distress on a 11-point Likert scale from zero (nothing) to ten (extreme). For analysis, distress was examined through a binary variable of distress 'caseness', with DT scores of  $\geq 4$  denoting distress<sup>17</sup>.

Patients indicated which issues were causing them distress by ticking a box on the Problem Checklist. The questionnaire included further tick-box questions to determine whether patients were currently in receipt of psychosocial support; and if not, whether they would like to receive this support. Information on sociodemographic characteristics (sex, age, ethnicity, living situation and employment situation) was captured using closed questions.

### Data analysis methods

The prevalence of distress and 95% Confidence Intervals (CIs) were calculated using the cut-off score described in the measurements section. Univariate logistic regression was then applied to examine the associations between distress, study sites and demographic characteristics. Subsequently, multivariate logistic regression was used to identify whether study site, staffing ratios and further demographic variables served as predictors of distress.

All variables were entered simultaneously. Finally, univariate logistic regression was used to investigate the perceived need for support and prevalence of problem types across the study sites. All analysis were conducted using Stata Statistical Software: Release 14.2<sup>23</sup>.

## RESULTS

Overall, a distress score of  $\geq 4$  was observed in 247 out of 505 respondents, indicating that 48.9% (95% CI: 44.5 – 53.4) of ICHD patients were experiencing some form of distress. 25.7% (130 cases, 95% CI: 22.0-29.8) were identified as having mild to moderate distress (DT score 4-6). A DT score of  $\geq 7$  was observed for 117 cases, indicating that 23.2% of patients (95% CI: 19.6-27.1) across all study sites were experiencing severe distress.

Findings from univariate analyses (**Error! Reference source not found.2**) showed an association between distress and study site, with patients in units F and G less likely to be cases than in unit A, B and C. Further associations were found with age group and employment situation. Specifically, those aged 18-39, 40-49 and 50-59 and those patients who were unemployed or considered themselves unable to work were significantly more likely to be distressed than those aged 70 or above and retired.

Table 2. Summary of univariate logistic analyses for association between distress and demographic variables

| Variable             | Distress (DT $\geq 4$ )<br>% (n) | OR<br>(95% CI)      | P-value | Likelihood-Ratio Chi2       |
|----------------------|----------------------------------|---------------------|---------|-----------------------------|
| Total (n=505)        | 48.9 (247)                       |                     |         |                             |
| Main unit<br>(n=505) |                                  |                     |         | $\chi^2(6)=15.05, p = .019$ |
| A                    | 56.3 (36)                        | 1.00                | -       |                             |
| B                    | 56.3 (36)                        | 1.00<br>(0.50-2.01) | 1.00    |                             |
| C                    | 59.2 (58)                        | 1.13<br>(0.60-2.14) | 0.712   |                             |
| D                    | 48.0 (35)                        | 0.72<br>(0.37-1.41) | 0.332   |                             |
| E                    | 43.3 (45)                        | 0.59<br>(0.32-1.11) | 0.103   |                             |
| F                    | 34.1 (15)                        | 0.40<br>(0.18-0.89) | 0.025   |                             |
| G                    | 37.9 (22)                        | 0.48<br>(0.23-0.98) | 0.044   |                             |
| Sex<br>(n=499)       |                                  |                     |         | $\chi^2(1)=2.23, p = .135$  |
| Male                 | 46.3 (143)                       | 1.00                |         |                             |

|                                 |            |                      |         |                             |
|---------------------------------|------------|----------------------|---------|-----------------------------|
| Female                          | 53.2 (101) | 1.32<br>(0.92-1.89)  | 0.136   |                             |
| Age Category<br>(n=499)         |            |                      |         | $\chi^2(4)=22.36, p<0.001$  |
| 18-39                           | 60.0 (30)  | 2.46<br>(1.30-4.64)  | 0.005   |                             |
| 40-49                           | 62.0 (31)  | 2.68<br>(1.41-5.07)  | 0.003   |                             |
| 50-59                           | 61.9 (60)  | 2.66<br>(1.61-4.39)  | <0.0001 |                             |
| 60-69                           | 47.1 (49)  | 1.46<br>(0.90-2.36)  | 0.122   |                             |
| ≥70                             | 37.9 (75)  | 1.00                 | -       |                             |
| Ethnicity<br>(n=498)            |            |                      |         | $\chi^2(1)=1.22, p = .269$  |
| White                           | 48.3 (220) | 1.00                 | -       |                             |
| Other                           | 57.1 (24)  | 1.43<br>(0.76-2.71)  | 0.272   |                             |
| Time on Dialysis<br>(n=497)     |            |                      |         | $\chi^2(3)=2.99, p = .393$  |
| <6 months                       | 48.8 (42)  | 1.28<br>(0.74-2.22)  | 0.371   |                             |
| 6 months to 3 years             | 52.1 (100) | 1.46<br>(0.93-2.30)  | 0.097   |                             |
| 3 to 5 years                    | 51.1 (46)  | 1.40<br>(0.82-2.42)  | 0.216   |                             |
| >5 years                        | 42.6 (55)  | 1.00                 | -       |                             |
| Living situation<br>(n=492)     |            |                      |         | $\chi^2(1)=1.00, p = .316$  |
| Living alone                    | 52.1 (76)  | 1.00                 | -       |                             |
| Living together                 | 47.1 (163) | 0.82<br>(0.56-1.21)  | 0.316   |                             |
| Employment<br>situation (n=497) |            |                      |         | $\chi^2(3)=26.17, p <0.001$ |
| Employed                        | 42.4 (28)  | 1.14<br>(0.65-1.98)  | 0.649   |                             |
| Unemployed                      | 78.6 (11)  | 5.65<br>(1.54-20.83) | 0.009   |                             |
| Unable to work                  | 61.2 (112) | 2.43<br>(1.64-3.62)  | <0.0001 |                             |
| Retired                         | 39.3 (92)  | 1.00                 | -       |                             |

DT: Distress Thermometer; OR: Odds Ratio; 95% CI: 95% confidence interval.

A multivariate logistic regression model (**Error! Reference source not found.3**) including renal unit and other demographic variables sex, age, ethnicity, time on dialysis, living situation and

employment situation was found to be a significant predictor of distress (LR  $\chi^2(19)= 56.77, p < 0.0001$ ). The renal unit that patients belonged to significantly predicted distress, with being a patient in unit E ( $\beta -0.718$ ) or F ( $\beta -1.083$ ) significantly reducing the likelihood of distress compared to being a patient in unit A. Time on dialysis was also found to be a predictor of distress, with being on dialysis for a period of 3 to 5 years significantly increasing the likelihood of distress. Age group and employment situation were not found to be predictors.

Table 3: Multivariate regression model for predictors of distress including renal unit and demographic variables

| Predictor        | OR (95% CIs)      | P-value |
|------------------|-------------------|---------|
| Constant         | 0.688 (0.32-1.47) |         |
| Renal unit       |                   |         |
| A                | <i>reference</i>  |         |
| B                | 0.851 (0.40-1.82) | 0.676   |
| C                | 1.193 (0.60-2.36) | 0.612   |
| D                | 0.663 (0.32-1.38) | 0.272   |
| E                | 0.488 (0.25-0.97) | 0.041   |
| F                | 0.338 (0.14-0.84) | 0.019   |
| G                | 0.508 (0.23-1.10) | 0.086   |
| Sex              |                   |         |
| Male             | <i>reference</i>  |         |
| Female           | 1.268 (0.85-1.89) | 0.241   |
| Age Category     |                   |         |
| 18-39            | 2.186 (0.92-5.22) | 0.078   |
| 40-49            | 2.173 (0.92-5.13) | 0.077   |
| 50-59            | 1.809 (0.89-3.73) | 0.108   |
| 60-69            | 1.179 (0.68-2.05) | 0.560   |
| $\geq 70$        | <i>reference</i>  |         |
| Ethnicity        |                   |         |
| White            | <i>reference</i>  |         |
| Other            | 1.037 (0.48-2.22) | 0.925   |
| Time on Dialysis |                   |         |
| <6 months        | 1.509 (0.82-2.77) | 0.183   |

|                       |                    |       |
|-----------------------|--------------------|-------|
| 6 months to 3 years   | 1.434 (0.88-2.34)  | 0.149 |
| 3 to 5 years          | 1.833 (1.01-3.34)  | 0.047 |
| >5 years              | <i>reference</i>   |       |
| Living situation      |                    |       |
| Living alone          | <i>reference</i>   |       |
| Living together       | 0.725 (0.48-1.10)  | 0.134 |
| Employment situation  |                    |       |
| Employed/in Education | 0.560 (0.28-1.30)  | 0.194 |
| Unemployed            | 4.058 (0.90-18.33) | 0.069 |
| Unable to work        | 1.791 (0.97-3.30)  | 0.061 |
| Retired               | <i>reference</i>   |       |
| No. of observations   | 488                |       |

Further regression analysis was undertaken to provide more insight into the relationship between distress and psychosocial staffing ratios. Three similar multivariate logistic regression models were created, differing only by inclusion of either the total ratio of renal dedicated psychosocial staff, the ratio of renal social workers or the ratio of renal psychologists/counsellors (**Error! Reference source not found.**4). Whilst acknowledging the difference between psychologists and counsellors, it was decided to group these professions together in model 3 because of their low numbers. All models included the demographics sex, ethnicity, age, living situation, time on dialysis and employment situation as predictors.

The results were as follows:

- Model 1 (including total ratios of psychosocial staff): a collective significant effect was found, LR  $\chi^2$  (14)=47.68,  $p < 0.0001$ . Specifically, the ratio of total psychosocial staff was found to significantly predict distress, with higher ratios of staff leading to a lower likelihood of distress ( $\beta$  -.43,  $p = 0.008$ ).
- Model 2 (including ratios of social work staff): This model also returned a significant result, predicting distress LR  $\chi^2$  (14)=52.57,  $p < 0.0001$ . A significant association was found between social worker ratios and distress, with likelihood of distress reducing as social worker ratios increased ( $\beta$  -.71,  $p = 0.001$ ).



- 1  
2  
3  
4  
5  
6  
7  
8  
9  
10
- Model 3 (including ratios of psychology/counselling staff): Overall, the model significantly predicted distress, LR  $\chi^2$  (14)= 40.60,  $p < 0.001$ , but the ratio of psychology/counselling staff was not found to be a significant predictor ( $\beta$  -.13,  $p = 0.706$ ).

11  
12  
13  
14  
15  
16  
17  
18  
19  
20  
21  
22  
23  
24  
25  
26  
27  
28  
29  
30  
31  
32  
33  
34  
35  
36  
37  
38  
39  
40  
41  
42  
43  
44  
45  
46  
47  
48  
49  
50  
51  
52  
53  
54  
55  
56  
57  
58  
59  
60

Table 4: Multivariate logistic regression models for predictors of distress including staff ratios and demographic variables

| Predictor                      | Model 1             |         | Model 2              |         | Model 3              |         |
|--------------------------------|---------------------|---------|----------------------|---------|----------------------|---------|
|                                | OR<br>(95% CI)      | P-value | OR<br>(95% CI)       | P-value | OR<br>(95% CI)       | P-value |
| Constant                       | 0.69<br>(0.37-1.29) |         | 0.66<br>(0.37-1.18)  |         | 0.468<br>(0.26-0.85) |         |
| Total psychosocial staff ratio | 0.65<br>(0.47-0.89) | 0.008   |                      |         |                      |         |
| Social work ratio              |                     |         | 0.49<br>(0.33-0.74)  | 0.001   |                      |         |
| Psychology/counselling ratio   |                     |         |                      |         | 0.878<br>(0.45-1.73) | 0.706   |
| Sex                            |                     |         |                      |         |                      |         |
| Male <i>reference</i>          |                     |         |                      |         |                      |         |
| Female                         | 1.19<br>(0.81-1.76) | 0.379   | 1.22<br>(0.83-1.80)  | 0.319   | 1.211<br>(0.82-1.79) | 0.335   |
| Age Category                   |                     |         |                      |         |                      |         |
| 18-39                          | 2.14<br>(0.91-5.04) | 0.083   | 2.20<br>(0.93-5.21)  | 0.074   | 2.01<br>(0.86-4.72)  | 0.107   |
| 40-49                          | 2.11<br>(0.91-4.92) | 0.084   | 2.15<br>(0.92-5.02)  | 0.078   | 2.22<br>(0.95-5.15)  | 0.064   |
| 50-59                          | 1.83<br>(0.90-3.72) | 0.096   | 1.801<br>(0.88-3.67) | 0.105   | 1.946<br>(0.96-3.95) | 0.065   |
| 60-69                          | 1.20<br>(0.70-2.08) | 0.504   | 1.210<br>(0.70-2.09) | 0.494   | 1.224<br>(0.71-2.10) | 0.464   |
| $\geq 70$ <i>reference</i>     |                     |         |                      |         |                      |         |
| Ethnicity                      |                     |         |                      |         |                      |         |
| White <i>reference</i>         |                     |         |                      |         |                      |         |
| Other                          | 0.94<br>(0.45-1.96) | 0.859   | 0.95<br>(0.45-2.00)  | 0.892   | 1.01<br>(0.48-2.10)  | 0.991   |
| Time on Dialysis               |                     |         |                      |         |                      |         |
| <6 months                      | 1.58<br>(0.87-2.87) | 0.137   | 1.51<br>(0.83-2.75)  | 0.180   | 1.68<br>(0.93-3.05)  | 0.086   |
| 6 months to 3 years            | 1.47<br>(0.91-2.39) | 0.119   | 1.45<br>(0.89-2.36)  | 0.131   | 1.56<br>(0.96-2.52)  | 0.070   |

|                               |                      |       |                      |       |                      |       |
|-------------------------------|----------------------|-------|----------------------|-------|----------------------|-------|
| 3 to 5 years                  | 1.87<br>(1.04-3.37)  | 0.037 | 1.86<br>(1.02-3.35)  | 0.041 | 1.91<br>(1.09-3.42)  | 0.029 |
| >5 years <i>reference</i>     |                      |       |                      |       |                      |       |
| Living situation              |                      |       |                      |       |                      |       |
| Living alone <i>reference</i> |                      |       |                      |       |                      |       |
| Living together               | 0.77<br>(0.51-1.16)  | 0.206 | 0.75<br>(0.49-1.13)  | 0.167 | 0.77<br>(0.51-1.16)  | 0.217 |
| Employment situation          |                      |       |                      |       |                      |       |
| Employed                      | 0.61<br>(0.28-1.29)  | 0.190 | 0.61<br>(0.28-1.29)  | 0.190 | 0.64<br>(0.30-1.36)  | 0.244 |
| Unemployed                    | 3.49<br>(0.79-15.51) | 0.100 | 3.76<br>(0.84-16.81) | 0.084 | 3.41<br>(0.77-15.12) | 0.106 |
| Unable to work                | 1.68<br>(0.93-3.04)  | 0.088 | 1.71<br>(0.94-3.10)  | 0.080 | 1.64<br>(0.90-2.95)  | 0.104 |
| Retired <i>reference</i>      |                      |       |                      |       |                      |       |
| No. of observations           | 488                  |       | 488                  |       | 488                  |       |

43.4% of patients reported one or more practical issues, such as problems related to finances or housing and 60.9% of patients reported one or more emotional issues (such as depression or fears). 17.6% of respondents stated that they would like to receive support for their problems, but were not currently receiving any. Univariate analysis indicated that there were differences across units ( $\chi^2(6) = 37.80$ ,  $p < 0.0001$ ), with patients in units C, D, E, F and G significantly less likely to report an unmet need for support than patients in unit A and B (**Error! Reference source not found.**5). Of the people that reported a need for support, 75.9% were classed as distressed.

Table 5: Univariate logistic analysis of patients reporting a perceived unmet need for support per study site

| Unit          | % Unmet need for support (n) | Odds ratio (95% CI) | P-value |
|---------------|------------------------------|---------------------|---------|
| Total (n=499) | 17.6 (88)                    |                     |         |
| A             | 35.5 (22)                    | 1.00                |         |
| B             | 35.4 (23)                    | 0.996 (0.48-2.06)   | 0.991   |
| C             | 12.5 (12)                    | 0.260 (0.12-0.58)   | 0.001   |
| D             | 16.9 (12)                    | 0.370 (0.17-0.83)   | 0.016   |
| E             | 8.7 (9)                      | 0.172 (0.073-0.41)  | <0.001  |
| F             | 13.9 (6)                     | 0.295 (0.11-0.81)   | 0.017   |
| G             | 6.9 (4)                      | 0.135 (0.043-0.42)  | 0.001   |

## DISCUSSION

### Main findings

It was found that almost half (48.9%, 95% CI: 44.5 – 53.4) of all ICHD patients participating in this study experienced some form of distress, indicating the need for psychosocial support and services. In general, our results suggest that there is a significant relationship between the different UK models of renal psychosocial service delivery and ICHD patient distress. An association between distress and models of psychosocial service provision was found and the results indicated that psychosocial staff-to-patient ratios significantly predict distress in patients. Specifically, patients in units with higher total psychosocial staff ratios and higher social work ratios were less likely to experience distress, even after controlling for their sex, age, ethnicity, time on dialysis, living situation and employment status. Furthermore, differences across units were found in patients' reported unmet need for support, with patients in units with both practical (as provided by a social worker/welfare advisor) and emotional support (from a psychologist/counsellor) available significantly less likely to want (additional) support.

### Strengths and limitations

The key limitation of this study is its cross-sectional nature. A longitudinal panel study that would measure patient's distress levels before and after receiving certain psychosocial services (or no such services) would have had a higher internal validity, however, such study was not possible for practical reasons. Due to the selection of study sites based on psychosocial service provision models, the average psychosocial staffing ratios in this study were higher than the overall UK renal psychosocial staffing ratios. Based on our findings, this suggests that we may have underestimated overall distress prevalence. However, importantly, one of the strengths of this study is the high response rate. Of relevance for the aim of exploring distress across different models of service provision, this increases the probability that the scores are representative of the patients in the participating units. Due to

1  
2  
3 a lack of available data, it was not possible to examine these findings in the wider, unit-specific  
4 context, including factors such as patients' access and use of general psychosocial services in  
5 the hospital or community. However, in-depth qualitative research was completed with renal  
6 staff to explore the wider process of psychosocial service delivery in each study site in a linked  
7 component of this study (findings to be reported elsewhere).  
8  
9  
10  
11

## 12 **Implications**

13  
14  
15 This is the first study to explore distress across different models of renal psychosocial service  
16 provision. Whilst the overall prevalence of distress was in line with estimates from other  
17 studies that used self-reported measures for depression and anxiety<sup>8,19</sup>, it is the difference in  
18 prevalence across units that is of importance. Associations between distress and demographic  
19 variables have been widely reported in other studies<sup>24,25</sup>, however our result show that after  
20 accounting for models of service provision, other demographic factors (apart from time on  
21 dialysis) do not emerge as significant predictors of distress. This finding contradicts recently  
22 published findings by Damery, Braun, Sein, et al. who reported no influence of service delivery  
23 models on distress in their study<sup>24</sup>. There are a couple of possible explanations for this  
24 discrepancy: firstly, Damery et al. only compared prevalence of mild-to moderate distress,  
25 leaving the prevalence of severe distress out of their analysis and excluding patients using  
26 psychiatric services since CKD stage 5 from participation. In the context of psychosocial  
27 service delivery, the current study took all levels of distress into account and did not exclude  
28 those who were already receiving support. Secondly, whilst Damery et al. did not report staff-  
29 to-patient ratios, only renal psychologists are mentioned, which appears to reflect little  
30 variation in models of service provision across the participating units. Any differences in  
31 staffing levels might have been too small to result in differences in patient distress. Finally,  
32 there was no mention of the presence of renal social workers, whose availability plays an  
33 important role in reducing patient distress, according to the current findings.  
34  
35  
36  
37  
38  
39  
40  
41  
42  
43  
44  
45  
46  
47  
48  
49  
50

51 The findings of this study are relevant for policy makers and practitioners in allocating  
52 resources to the management of distress in renal patients and in the wider context of  
53 psychosocial service delivery for those with long-term conditions. Not only does the evidence  
54 presented here show that renal psychosocial staff play a role in reducing patient distress, the  
55 results also highlight a higher patient-reported need for these services in hospitals where  
56  
57  
58  
59  
60

1  
2  
3 psychosocial staffing numbers are low or non-existent. This is in line with, Damery et al. who  
4 found higher levels of need in units without renal psychologists available, compared to those  
5 with renal psychologists available<sup>24</sup>. Yet, psychosocial services have steadily reduced over the  
6 last years <sup>15</sup>, leaving patients having to look for support from services provided in the  
7 community. The results could indicate that these services are inaccessible or unable to  
8 provide the support patients want, leading to higher distress. Symptoms of distress can have  
9 a negative effect on patient quality of life, medical outcomes and costs, through reduced  
10 treatment-adherence and increased rates of mortality, hospitalisation and length of hospital  
11 stay <sup>18–20</sup>. Therefore, the findings emphasise a need for increased numbers of integrated  
12 psychosocial staff and a renal psychosocial care pathway, which, importantly, should include  
13 practical as well as emotional support. Importantly, since multimorbidity in CKD patients is  
14 high, these levels of unmet need might not be restricted to the renal population only, but  
15 could reflect an issue in the wider context of service provision for patients living with long-  
16 term conditions.  
17  
18  
19  
20  
21  
22  
23  
24  
25  
26  
27  
28  
29

30 Whilst further investigation into appropriate staffing levels is necessary and the wider number  
31 of patients on all treatment modalities should be taken into account to determine these, the  
32 findings could provide a first indication of the minimum ratios of psychosocial staff required.  
33 The first participating unit with a dedicated social worker to have significantly lower distress  
34 levels than a unit without any support, had a staffing ratio of 1 social worker per 142 ICHD  
35 patients; the staffing ratio in the first unit with a dedicated psychologist to have significantly  
36 lower distress levels was 1 psychologist per 532 ICHD patients.  
37  
38  
39  
40  
41  
42  
43

44 In addition to adequate staffing levels, another important aspect of a psychosocial care  
45 pathway would be the identification of patients in need for support, which could be achieved  
46 by screening for distress. It is essential that the focus of this screening is not only on detecting  
47 clinically significant distress that could warrant a psychological intervention. Instead, for it to  
48 identify patients that could benefit from any type of psychosocial service, screening processes  
49 should bring patients to light who are experiencing distress, in the wider sense of the word,  
50 and/or psychosocial issues. For example, practical problems (such as issues with social care  
51 or transport) would not necessarily make a patient report distress that would meet the  
52 criteria for a formal diagnosis of anxiety or depression. Yet, in order to solve these problems  
53  
54  
55  
56  
57  
58  
59  
60

1  
2  
3 and prevent them from contributing to negative health outcomes, a patient might still require  
4 support from a social worker. The use of the DT and Problem Checklist, already recommended  
5 in US oncology care guidelines<sup>17</sup>, would allow for such a wide approach to screening and has  
6 been found to be an acceptable tool in the renal population<sup>22</sup>. Still, even with this wide  
7 approach to capturing distress, our results show that it cannot be assumed that distress  
8 equals need for support. As such, any screening tool should always include a question that  
9 captures a patient-reported need and want for psychosocial services.  
10  
11

12  
13  
14  
15  
16  
17 In conclusion, our findings support the incorporation of dedicated psychosocial support in the  
18 renal care pathway. At a time of calls for the evaluation and restructuring of CKD care models  
19 to improve outcomes and reduce the costs of care, the need for true integration of renal  
20 psychosocial services in new models of care can no longer be ignored.  
21  
22

### 23 24 25 **ACKNOWLEDGEMENTS**

26  
27 We would like to thank the staff and patients of the participating renal units for their  
28 assistance and participation.  
29

### 30 31 32 **COMPETING INTERESTS**

33  
34 The authors report a grant from KCUK during the conduct of the study. PO also discloses  
35 personal fees from Baxter International and grants from KCUK, Kidney Research UK,  
36 National Institute of Health Research, and the British Renal Society, outside the submitted  
37 work.  
38  
39

### 40 41 42 **FUNDING**

43  
44 This work is part of a larger Industrial Case PhD Studentship, co-funded by KCUK and the  
45 Higher Education Innovation Fund. KCUK identified the focus of the study, but had no  
46 involvement in the data collection, analysis or writing of this manuscript.  
47  
48

### 49 50 51 **AUTHORS' CONTRIBUTIONS**

52  
53 MS and PO were involved in the design and data collection. MS and DK designed a data  
54 analysis plan and MS undertook the data analysis under supervision and support from DK.  
55 MS drafted the manuscript under supervision from PO and DK, who both completed  
56  
57  
58  
59  
60

1  
2  
3 revisions. All authors provided intellectual content of critical importance to the work  
4 described and have read and approved the final manuscript.  
5  
6

#### 7 **DATA SHARING STATEMENT**

8  
9  
10 The dataset used during the current study is available from the corresponding author on  
11 reasonable request after completion of the wider project.  
12  
13

#### 14 **REFERENCES**

- 15  
16  
17 1. Jha V, Garcia-Garcia G, Iseki K, et al. Chronic kidney disease: global dimension and  
18 perspectives. *Lancet*. 2013;382(9888):260-272. doi:10.1016/S0140-6736(13)60687-X  
19  
20  
21 2. Jansen DL. Living with Chronic Kidney Disease: The role of illness perceptions,  
22 treatment perceptions and social support. April 2012.  
23  
24 <https://dspace.library.uu.nl/handle/1874/236030>. Accessed May 25, 2018.  
25  
26  
27 3. National Institute for Health and Care Excellence. *Chronic Kidney Disease in Adults*.  
28 NICE; 2017. <https://www.nice.org.uk/guidance/qs5>. Accessed December 11, 2017.  
29  
30  
31 4. Bayliss EA, Bhardwaja B, Ross C, et al. Multidisciplinary team care may slow the rate  
32 of decline in renal function. *Clin J Am Soc Nephrol*. 2011;6(4):704-710.  
33  
34 doi:10.2215/CJN.06610810  
35  
36  
37 5. Tonelli M, Wiebe N, Guthrie B, et al. Comorbidity as a driver of adverse outcomes in  
38 people with chronic kidney disease. *Kidney Int*. 2015;88(4):859-866.  
39  
40 doi:10.1038/ki.2015.228  
41  
42  
43 6. Kidney Health Advisory Group. *Kidney Health: Delivering Excellence.*; 2013.  
44  
45 [https://pkdcharity.org.uk/images/downloads/Kidney-Health-Delivering-](https://pkdcharity.org.uk/images/downloads/Kidney-Health-Delivering-Excellence.pdf)  
46  
47 [Excellence.pdf](https://pkdcharity.org.uk/images/downloads/Kidney-Health-Delivering-Excellence.pdf). Accessed June 11, 2019.  
48  
49  
50 7. Sharif MU, Elsayed ME, Stack AG. The global nephrology workforce: Emerging threats  
51 and potential solutions! *Clin Kidney J*. 2016;9(1):11-22. doi:10.1093/ckj/sfv111  
52  
53  
54 8. Cukor D, Ver Halen N, Fruchter Y, et al. Psychosocial Issues in Chronic Kidney Disease  
55 Patients. In: Kimmel PL, Rosenberg ME, eds. *Chronic Renal Disease*. Academic Press;  
56  
57 2015:229-236. doi:10.1016/B978-0-12-411602-3.00019-6  
58  
59  
60

- 1  
2  
3 9. Bello AK, Levin A, Manns BJ, et al. Effective CKD care in european countries:  
4 Challenges and opportunities for health policy. *Am J Kidney Dis*. 2015;65(1):15-25.  
5 doi:10.1053/j.ajkd.2014.07.033  
6  
7  
8
- 9  
10 10. Bale C, Douglas A, Jegatheesan D, et al. Psychosocial Factors in End-Stage Kidney  
11 Disease Patients at a Tertiary Hospital in Australia. *Int J Nephrol*. 2016;2016:1-6.  
12 doi:10.1155/2016/2051586  
13  
14
- 15 11. Campbell KL, Murray EM. Allied health services to nephrology: An audit of current  
16 workforce and meeting future challenges. *J Ren Care*. 2013;39(1):52-61.  
17 doi:10.1111/j.1755-6686.2012.00330.x  
18  
19
- 20 21 12. Merighi JR, Zheng M, Browne T. Nephrology Social Workers' Caseloads and Hourly  
22 Wages in 2014 and 2017: Findings from the National Kidney Foundation Council of  
23 Nephrology Social Workers Professional Practice Survey. *Natl Kidney Found J Nephrol  
24 Soc Work*. 2018. <http://education.kidney.org/JNSW-CE-Program>. Accessed November  
25 14, 2019.  
26  
27  
28  
29
- 30 31 13. Browne T, Merighi JR, Washington T, et al. Nephrology Social Work. In: *Handbook of  
32 Health Social Work*. Wiley; 2019:411-440. doi:10.1002/9781119420743.ch18  
33  
34  
35
- 36 14. Seekles ML, Coyne E, Ormandy P, et al. *The UK Renal Psychosocial Workforce : A  
37 Mapping Exercise.*; 2018. <http://usir.salford.ac.uk/46906/>. Accessed August 10, 2018.  
38  
39
- 40 15. Seekles ML, Ormandy P, Coyne E. Mapping the UK renal psychosocial workforce: the  
41 first comprehensive workforce survey. *BMC Nephrol*. 2019;20(1):100.  
42 doi:10.1186/s12882-019-1287-0  
43  
44  
45
- 46 16. NHS England. *Service Specifications: In Centre Haemodialysis (ICHHD): Main and  
47 Satellite Units.*; 2017. [https://www.england.nhs.uk/commissioning/wp-  
48 content/uploads/sites/12/2015/01/a06-serv-spec-haemodialysis-ichd.pdf](https://www.england.nhs.uk/commissioning/wp-content/uploads/sites/12/2015/01/a06-serv-spec-haemodialysis-ichd.pdf). Accessed  
49 December 11, 2017.  
50  
51  
52
- 53 17. National Comprehensive Cancer Network. *Distress Management.*; 2018.  
54 [https://oncolife.com.ua/doc/nccn/Distress\\_Management.pdf](https://oncolife.com.ua/doc/nccn/Distress_Management.pdf).  
55  
56  
57
- 58 18. Palmer S, Vecchio M, Craig JC, et al. Association between depression and death in  
59  
60



- 1  
2  
3 people with CKD: A meta-analysis of cohort studies. *Am J Kidney Dis.* 2013;62(3):493-  
4 505. doi:10.1053/j.ajkd.2013.02.369  
5  
6  
7  
8 19. Schouten RW, Haverkamp GL, Loosman WL, et al. Anxiety Symptoms, Mortality, and  
9 Hospitalization in Patients Receiving Maintenance Dialysis: A Cohort Study. *Am J*  
10 *Kidney Dis.* 2019;74(2):158-166. doi:10.1053/j.ajkd.2019.02.017  
11  
12  
13  
14 20. Tsai YC, Chiu YW, Hung CC, et al. Association of symptoms of depression with  
15 progression of CKD. *Am J Kidney Dis.* 2012;60(1):54-61.  
16  
17 doi:10.1053/j.ajkd.2012.02.325  
18  
19  
20 21. UK Renal Registry. *UK Renal Registry 21st Annual Report - Data to 31/12/2017.*  
21 Bristol, UK; 2019. <https://www.renalreg.org/publications-reports/>.  
22  
23  
24 22. Alston H, Vickerstaff V, Low J, Beatty C, Da Silva Gane M, Burns A. SP707 Validation of  
25 the Distress Thermometer in a UK renal population. *Nephrol Dial Transplant.*  
26 2015;30(suppl\_3):iii612-iii612. doi:10.1093/ndt/gfv200.26  
27  
28  
29  
30 23. StataCorp. Stata Statistical Software: Release 14. College Station, TX: StataCorp LP.  
31 2015. 2015.  
32  
33  
34 24. Damery S, Brown C, Sein K, et al. The prevalence of mild-to-moderate distress in  
35 patients with end-stage renal disease: Results from a patient survey using the  
36 emotion thermometers in four hospital Trusts in the West Midlands, UK. *BMJ Open.*  
37 2019;9(5). doi:10.1136/bmjopen-2018-027982  
38  
39  
40  
41 25. Goh ZS, Griva K. Anxiety and depression in patients with end-stage renal disease:  
42 Impact and management challenges – A narrative review. *Int J Nephrol Renovasc Dis.*  
43 2018;11:93-102. doi:10.2147/IJNRD.S126615  
44  
45  
46  
47  
48  
49  
50  
51  
52  
53  
54  
55  
56  
57  
58  
59  
60

1  
2  
3  
4  
5  
6  
7  
8  
9  
10  
11  
12  
13  
14  
15  
16  
17  
18  
19  
20  
21  
22  
23  
24  
25  
26  
27  
28  
29  
30  
31  
32  
33  
34  
35  
36  
37  
38  
39  
40  
41  
42  
43  
44  
45  
46  
47  
48  
49  
50  
51  
52  
53  
54  
55  
56  
57  
58  
59  
60

For peer review only

**STROBE 2007 (v4) Statement—Checklist of items that should be included in reports of *cross-sectional studies***

| Section/Topic                | Item # | Recommendation                                                                                                                                                                       | Reported on page # |
|------------------------------|--------|--------------------------------------------------------------------------------------------------------------------------------------------------------------------------------------|--------------------|
| <b>Title and abstract</b>    | 1      | (a) Indicate the study's design with a commonly used term in the title or the abstract                                                                                               | 1                  |
|                              |        | (b) Provide in the abstract an informative and balanced summary of what was done and what was found                                                                                  | 2                  |
| <b>Introduction</b>          |        |                                                                                                                                                                                      |                    |
| Background/rationale         | 2      | Explain the scientific background and rationale for the investigation being reported                                                                                                 | 4                  |
| Objectives                   | 3      | State specific objectives, including any prespecified hypotheses                                                                                                                     | 5                  |
| <b>Methods</b>               |        |                                                                                                                                                                                      |                    |
| Study design                 | 4      | Present key elements of study design early in the paper                                                                                                                              | 5                  |
| Setting                      | 5      | Describe the setting, locations, and relevant dates, including periods of recruitment, exposure, follow-up, and data collection                                                      | 5                  |
| Participants                 | 6      | (a) Give the eligibility criteria, and the sources and methods of selection of participants                                                                                          | 6                  |
| Variables                    | 7      | Clearly define all outcomes, exposures, predictors, potential confounders, and effect modifiers. Give diagnostic criteria, if applicable                                             | 9                  |
| Data sources/<br>measurement | 8*     | For each variable of interest, give sources of data and details of methods of assessment (measurement). Describe comparability of assessment methods if there is more than one group | 9                  |
| Bias                         | 9      | Describe any efforts to address potential sources of bias                                                                                                                            | 7                  |
| Study size                   | 10     | Explain how the study size was arrived at                                                                                                                                            | 7                  |
| Quantitative variables       | 11     | Explain how quantitative variables were handled in the analyses. If applicable, describe which groupings were chosen and why                                                         | 9                  |
| Statistical methods          | 12     | (a) Describe all statistical methods, including those used to control for confounding                                                                                                | 9                  |
|                              |        | (b) Describe any methods used to examine subgroups and interactions                                                                                                                  | 9                  |
|                              |        | (c) Explain how missing data were addressed                                                                                                                                          | 7                  |
|                              |        | (d) If applicable, describe analytical methods taking account of sampling strategy                                                                                                   | n/a                |
|                              |        | (e) Describe any sensitivity analyses                                                                                                                                                | n/a                |
| <b>Results</b>               |        |                                                                                                                                                                                      |                    |

|                          |     |                                                                                                                                                                                                              |       |
|--------------------------|-----|--------------------------------------------------------------------------------------------------------------------------------------------------------------------------------------------------------------|-------|
| Participants             | 13* | (a) Report numbers of individuals at each stage of study—eg numbers potentially eligible, examined for eligibility, confirmed eligible, included in the study, completing follow-up, and analysed            | 7     |
|                          |     | (b) Give reasons for non-participation at each stage                                                                                                                                                         | -     |
|                          |     | (c) Consider use of a flow diagram                                                                                                                                                                           | -     |
| Descriptive data         | 14* | (a) Give characteristics of study participants (eg demographic, clinical, social) and information on exposures and potential confounders                                                                     | 8     |
|                          |     | (b) Indicate number of participants with missing data for each variable of interest                                                                                                                          | 8     |
| Outcome data             | 15* | Report numbers of outcome events or summary measures                                                                                                                                                         | 10    |
| Main results             | 16  | (a) Give unadjusted estimates and, if applicable, confounder-adjusted estimates and their precision (eg, 95% confidence interval). Make clear which confounders were adjusted for and why they were included | 10    |
|                          |     | (b) Report category boundaries when continuous variables were categorized                                                                                                                                    | 10    |
|                          |     | (c) If relevant, consider translating estimates of relative risk into absolute risk for a meaningful time period                                                                                             |       |
| Other analyses           | 17  | Report other analyses done—eg analyses of subgroups and interactions, and sensitivity analyses                                                                                                               | 12-15 |
| <b>Discussion</b>        |     |                                                                                                                                                                                                              |       |
| Key results              | 18  | Summarise key results with reference to study objectives                                                                                                                                                     | 16    |
| Limitations              | 19  | Discuss limitations of the study, taking into account sources of potential bias or imprecision. Discuss both direction and magnitude of any potential bias                                                   | 16    |
| Interpretation           | 20  | Give a cautious overall interpretation of results considering objectives, limitations, multiplicity of analyses, results from similar studies, and other relevant evidence                                   | 17    |
| Generalisability         | 21  | Discuss the generalisability (external validity) of the study results                                                                                                                                        | 16-17 |
| <b>Other information</b> |     |                                                                                                                                                                                                              |       |
| Funding                  | 22  | Give the source of funding and the role of the funders for the present study and, if applicable, for the original study on which the present article is based                                                | 19    |

\*Give information separately for cases and controls in case-control studies and, if applicable, for exposed and unexposed groups in cohort and cross-sectional studies.

**Note:** An Explanation and Elaboration article discusses each checklist item and gives methodological background and published examples of transparent reporting. The STROBE checklist is best used in conjunction with this article (freely available on the Web sites of PLoS Medicine at <http://www.plosmedicine.org/>, Annals of Internal Medicine at <http://www.annals.org/>, and Epidemiology at <http://www.epidem.com/>). Information on the STROBE Initiative is available at [www.strobe-statement.org](http://www.strobe-statement.org).

# BMJ Open

## EXAMINING PATIENT DISTRESS AND UNMET NEED FOR SUPPORT ACROSS UK RENAL UNITS WITH VARYING MODELS OF PSYCHOSOCIAL CARE DELIVERY: A CROSS-SECTIONAL SURVEY STUDY.

|                                 |                                                                                                                                                                                                                                                                                     |
|---------------------------------|-------------------------------------------------------------------------------------------------------------------------------------------------------------------------------------------------------------------------------------------------------------------------------------|
| Journal:                        | <i>BMJ Open</i>                                                                                                                                                                                                                                                                     |
| Manuscript ID                   | bmjopen-2020-036931.R1                                                                                                                                                                                                                                                              |
| Article Type:                   | Original research                                                                                                                                                                                                                                                                   |
| Date Submitted by the Author:   | 11-Jun-2020                                                                                                                                                                                                                                                                         |
| Complete List of Authors:       | Seekles, Maaïke; University of Salford, School of Health and Society<br>Ormandy, Paula; University of Salford School of Health and Society,<br>School of Health and Society<br>Kamerāde, Daiga; University of Salford School of Health and Society,<br>School of Health and Society |
| <b>Primary Subject Heading</b>: | Renal medicine                                                                                                                                                                                                                                                                      |
| Secondary Subject Heading:      | Health services research, Mental health, Sociology                                                                                                                                                                                                                                  |
| Keywords:                       | Organisation of health services < HEALTH SERVICES ADMINISTRATION & MANAGEMENT, Nephrology < INTERNAL MEDICINE, MENTAL HEALTH, Dialysis < NEPHROLOGY, Depression & mood disorders < PSYCHIATRY, SOCIAL MEDICINE                                                                      |
|                                 |                                                                                                                                                                                                                                                                                     |

SCHOLARONE™  
Manuscripts

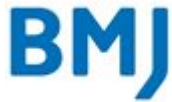

I, the Submitting Author has the right to grant and does grant on behalf of all authors of the Work (as defined in the below author licence), an exclusive licence and/or a non-exclusive licence for contributions from authors who are: i) UK Crown employees; ii) where BMJ has agreed a CC-BY licence shall apply, and/or iii) in accordance with the terms applicable for US Federal Government officers or employees acting as part of their official duties; on a worldwide, perpetual, irrevocable, royalty-free basis to BMJ Publishing Group Ltd ("BMJ") its licensees and where the relevant Journal is co-owned by BMJ to the co-owners of the Journal, to publish the Work in this journal and any other BMJ products and to exploit all rights, as set out in our [licence](#).

The Submitting Author accepts and understands that any supply made under these terms is made by BMJ to the Submitting Author unless you are acting as an employee on behalf of your employer or a postgraduate student of an affiliated institution which is paying any applicable article publishing charge ("APC") for Open Access articles. Where the Submitting Author wishes to make the Work available on an Open Access basis (and intends to pay the relevant APC), the terms of reuse of such Open Access shall be governed by a Creative Commons licence – details of these licences and which [Creative Commons](#) licence will apply to this Work are set out in our licence referred to above.

Other than as permitted in any relevant BMJ Author's Self Archiving Policies, I confirm this Work has not been accepted for publication elsewhere, is not being considered for publication elsewhere and does not duplicate material already published. I confirm all authors consent to publication of this Work and authorise the granting of this licence.

1  
2  
3  
4  
5  
6  
7  
8  
9  
10  
11  
12  
13  
14  
15  
16  
17  
18  
19  
20  
21  
22  
23  
24  
25  
26  
27  
28  
29  
30  
31  
32  
33  
34  
35  
36  
37  
38  
39  
40  
41  
42  
43  
44  
45  
46  
47  
48  
49  
50  
51  
52  
53  
54  
55  
56  
57  
58  
59  
60

**EXAMINING PATIENT DISTRESS AND UNMET NEED FOR SUPPORT ACROSS UK RENAL  
UNITS WITH VARYING MODELS OF PSYCHOSOCIAL CARE DELIVERY: A CROSS-SECTIONAL  
SURVEY STUDY.**

**AUTHORS**

**Maaïke L. Seekles (corresponding author):** T: +44(0) 0161 295 0396, E:

M.L.Seekles1@salford.ac.uk, A: School of Health and Society, University of Salford, Room  
L530, Allerton Building, Salford, M66PU, UK

**Professor Paula Ormandy:** School of Health and Society, University of Salford, Manchester,  
UK.

**Dr. Daiga Kamerāde:** Reader, School of Health and Society, University of Salford,  
Manchester, UK.

**WORD COUNT**

4367 words

## ABSTRACT

### Objective

To examine in-centre haemodialysis (ICHHD) patients' emotional distress and need for support across UK renal units with varying models of psychosocial service provision.

### Design

The study used a cross-sectional survey design. Logistic regression analysis was used to examine patient distress, as captured by the Distress Thermometer, and need for support, across different renal units.

### Setting

Seven renal units across England, Wales and Scotland. The units were purposively selected so that varying workforce models of renal psychosocial services were represented.

### Participants

In total, 752 patients were on dialysis in the participating centres on the days of data collection. All adult patients, who could understand English, and with capacity (as determined by the nurse in charge), were eligible to participate in the study. The questionnaire was completed by 509 patients, resulting in an overall response rate of 67.7%.

### Outcome measures

The prevalence of distress and patient reported need for support.

### Results

The results showed that 48.9% (95% Confidence Interval (CI): 44.5 – 53.4) of respondents experienced distress. A significant association between distress and models of renal psychosocial service provision was found ( $\chi^2(6)=15.05$ ,  $p = .019$ ). Multivariable logistic regression showed that patients in units with higher total psychosocial staffing ratios [odds ratio (OR) 0.65 (95% CI 0.47-0.89);  $p= .008$ ] and specifically higher social work ratios [OR 0.49 (95% CI 0.33-0.74;  $p= .001$ ) were less likely to experience distress, even after controlling for demographic variables. In addition, a higher patient-reported unmet need for support was



1  
2  
3 found in units where psychosocial staffing numbers are low or non-existent ( $\chi^2(6) = 37.80, p <$   
4  
5 0.001).

## 6 7 **Conclusions**

8  
9  
10 The novel findings emphasise a need for increased incorporation of dedicated renal  
11  
12 psychosocial staff into the renal care pathway. Importantly, these members of staff should be  
13  
14 able to offer support for psychological as well as practical and social care related issues.

## 15 16 **KEY WORDS**

17  
18 Nephrology, Psychosocial Support Systems, Interdisciplinary Health Team, Psychological  
19  
20 distress, Health Workforce, Chronic Disease

## 21 22 **STRENGTHS AND LIMITATIONS OF THIS STUDY**

- 23  
24  
25
- 26 • This is the first study to investigate distress in renal patients across varying models of  
27 psychosocial service delivery, providing a unique health systems research perspective.
  - 28 • The sample size of the study was large, with participants from seven renal units across  
29 the UK.
  - 30 • The overall response rate was high, increasing the probability that the findings are  
31 representative of the patients in participating units.
  - 32 • Those from black and minority ethnic (BAME) groups were under-represented in the  
33 responses.
  - 34 • The cross-sectional study design provided a snapshot of distress in renal patients, but  
35 future studies should consider a longitudinal panel study to capture changes in  
36 distress over time, for individuals and groups of patients along the renal pathway.
- 37  
38  
39  
40  
41  
42  
43  
44  
45  
46  
47  
48  
49  
50  
51  
52  
53  
54  
55  
56  
57  
58  
59  
60

## INTRODUCTION

Chronic kidney disease (CKD) is a worldwide public health problem, with increasing incidence and prevalence, high costs, and poor outcomes [1]. The disease is typically progressive and can be divided into five stages of increasing severity, with treatments based on these stages. For a small, but significant percentage of people, CKD progresses to end-stage renal disease (ESRD). At this stage, which is irreversible, the kidneys are no longer able to function and renal replacement therapy (RRT) – dialysis or transplantation – becomes necessary to maintain life [2,3]. According to the latest Renal Registry data, there were 64,887 patients receiving RRT in the UK at the end of 2017. Of these, 37.3% received in-centre haemodialysis (ICHHD), 5.4% received peritoneal dialysis, 2.0% dialysed at home and 55.2% had received a transplant [4]. People with CKD often have a range of comorbid disorders. Some of these, such as hypertension and diabetes, are risk factors of the disease. Others, such as heart failure or chronic pulmonary disease, are often co-prevalent as a result of CKD or because of shared risk factors [5,6]. Living with CKD, and especially ESRD, provides many ongoing physical, emotional, financial and/or social challenges throughout a patient's renal journey. These consequences of the disease and its comorbidities make patient access to expertise in medical, nursing, dietetic, pharmacological, psychological and social areas essential[7].

In recent years, against a global backdrop of shortages in the nephrology workforce, there have been increasing calls for a change in the existing models of renal care to manage the demands of an increasing CKD burden. A collaborative care model, in which a greater share of the work is performed by allied health professionals (including psychosocial staff) is one of the proposed solutions[8]. Acceptance that a focus on the psychosocial needs of the patients should be included in comprehensive psychosocial care has grown in recent years[9], yet this has not always translated into practice. Internationally, limited evidence suggests differences in the level and type of renal psychosocial care accessible to patients. A recent Europe-wide study found that multidisciplinary teams (defined as teams consisting of allied health professionals, e.g. expert nurses, dieticians and social workers) were routinely available to patients with CKD in only eight out of 17 studied countries[10]. In the US and Australia, renal dedicated social workers appear to be the point-person responsible for providing psychosocial care, although in both countries high caseloads and exceeded benchmarks were reported [11–13]. US renal social workers are in a special position, since ESRD is the only

1  
2  
3 disease for which Medicare's Conditions for Coverage Mandate requires a Masters-level  
4 trained social worker on every interdisciplinary team[14]. Generally, in the UK, while all  
5 members of staff within the renal unit have a role in providing general psychosocial support,  
6 the core specialist psychosocial professionals include a psychologist (clinical, counselling or  
7 health), a counsellor or a psychotherapist, and/or a social worker. There are differences in  
8 the training and expertise of these professionals. A psychologist will have undertaken a  
9 minimum of six years of training to doctorate level and will mainly support patients with  
10 diagnosed, complex mental health issues; a counsellor or psychotherapist will have a  
11 minimum of an undergraduate diploma, but may have a bachelor's degree or postgraduate  
12 qualifications and will support patients with emotional or behavioural issues; a renal social  
13 worker will have a bachelor's degree in social work and/or a post-graduate social work  
14 qualification and, broadly speaking, focuses on improving patients' quality of life and  
15 functioning in society by connecting them to community and social care services. Whilst the  
16 lines between these professions often seem blurred, it is important to recognise that these  
17 roles are not interchangeable and each professional uses different, and sometimes  
18 complementary, approaches to support patients. A recent workforce report by Seekles et al.  
19 [15] showed that in the UK, over the past 15 years, a change in renal psychosocial staffing  
20 levels had taken place. The number of renal social workers had reduced dramatically, whilst  
21 renal psychologists and counsellors had grown in numbers. In the UK too, recommended staff-  
22 to-patient ratios were far from being met. A general UK renal psychosocial service provision  
23 model was lacking: most renal units incorporated different psychosocial teams, made up of  
24 varying types and numbers of staff, while some units completely lacked any form of dedicated  
25 psychosocial support[16].

26  
27  
28  
29  
30  
31  
32  
33  
34  
35  
36  
37  
38  
39  
40  
41  
42  
43  
44  
45  
46  
47  
48  
49  
50  
51  
52  
53  
54  
55  
56  
57  
58  
59  
60  
61  
62  
63  
64  
65  
66  
67  
68  
69  
70  
71  
72  
73  
74  
75  
76  
77  
78  
79  
80  
81  
82  
83  
84  
85  
86  
87  
88  
89  
90  
91  
92  
93  
94  
95  
96  
97  
98  
99  
100  
101  
102  
103  
104  
105  
106  
107  
108  
109  
110  
111  
112  
113  
114  
115  
116  
117  
118  
119  
120  
121  
122  
123  
124  
125  
126  
127  
128  
129  
130  
131  
132  
133  
134  
135  
136  
137  
138  
139  
140  
141  
142  
143  
144  
145  
146  
147  
148  
149  
150  
151  
152  
153  
154  
155  
156  
157  
158  
159  
160  
161  
162  
163  
164  
165  
166  
167  
168  
169  
170  
171  
172  
173  
174  
175  
176  
177  
178  
179  
180  
181  
182  
183  
184  
185  
186  
187  
188  
189  
190  
191  
192  
193  
194  
195  
196  
197  
198  
199  
200  
201  
202  
203  
204  
205  
206  
207  
208  
209  
210  
211  
212  
213  
214  
215  
216  
217  
218  
219  
220  
221  
222  
223  
224  
225  
226  
227  
228  
229  
230  
231  
232  
233  
234  
235  
236  
237  
238  
239  
240  
241  
242  
243  
244  
245  
246  
247  
248  
249  
250  
251  
252  
253  
254  
255  
256  
257  
258  
259  
260  
261  
262  
263  
264  
265  
266  
267  
268  
269  
270  
271  
272  
273  
274  
275  
276  
277  
278  
279  
280  
281  
282  
283  
284  
285  
286  
287  
288  
289  
290  
291  
292  
293  
294  
295  
296  
297  
298  
299  
300  
301  
302  
303  
304  
305  
306  
307  
308  
309  
310  
311  
312  
313  
314  
315  
316  
317  
318  
319  
320  
321  
322  
323  
324  
325  
326  
327  
328  
329  
330  
331  
332  
333  
334  
335  
336  
337  
338  
339  
340  
341  
342  
343  
344  
345  
346  
347  
348  
349  
350  
351  
352  
353  
354  
355  
356  
357  
358  
359  
360  
361  
362  
363  
364  
365  
366  
367  
368  
369  
370  
371  
372  
373  
374  
375  
376  
377  
378  
379  
380  
381  
382  
383  
384  
385  
386  
387  
388  
389  
390  
391  
392  
393  
394  
395  
396  
397  
398  
399  
400  
401  
402  
403  
404  
405  
406  
407  
408  
409  
410  
411  
412  
413  
414  
415  
416  
417  
418  
419  
420  
421  
422  
423  
424  
425  
426  
427  
428  
429  
430  
431  
432  
433  
434  
435  
436  
437  
438  
439  
440  
441  
442  
443  
444  
445  
446  
447  
448  
449  
450  
451  
452  
453  
454  
455  
456  
457  
458  
459  
460  
461  
462  
463  
464  
465  
466  
467  
468  
469  
470  
471  
472  
473  
474  
475  
476  
477  
478  
479  
480  
481  
482  
483  
484  
485  
486  
487  
488  
489  
490  
491  
492  
493  
494  
495  
496  
497  
498  
499  
500  
501  
502  
503  
504  
505  
506  
507  
508  
509  
510  
511  
512  
513  
514  
515  
516  
517  
518  
519  
520  
521  
522  
523  
524  
525  
526  
527  
528  
529  
530  
531  
532  
533  
534  
535  
536  
537  
538  
539  
540  
541  
542  
543  
544  
545  
546  
547  
548  
549  
550  
551  
552  
553  
554  
555  
556  
557  
558  
559  
560  
561  
562  
563  
564  
565  
566  
567  
568  
569  
570  
571  
572  
573  
574  
575  
576  
577  
578  
579  
580  
581  
582  
583  
584  
585  
586  
587  
588  
589  
590  
591  
592  
593  
594  
595  
596  
597  
598  
599  
600  
601  
602  
603  
604  
605  
606  
607  
608  
609  
610  
611  
612  
613  
614  
615  
616  
617  
618  
619  
620  
621  
622  
623  
624  
625  
626  
627  
628  
629  
630  
631  
632  
633  
634  
635  
636  
637  
638  
639  
640  
641  
642  
643  
644  
645  
646  
647  
648  
649  
650  
651  
652  
653  
654  
655  
656  
657  
658  
659  
660  
661  
662  
663  
664  
665  
666  
667  
668  
669  
670  
671  
672  
673  
674  
675  
676  
677  
678  
679  
680  
681  
682  
683  
684  
685  
686  
687  
688  
689  
690  
691  
692  
693  
694  
695  
696  
697  
698  
699  
700  
701  
702  
703  
704  
705  
706  
707  
708  
709  
710  
711  
712  
713  
714  
715  
716  
717  
718  
719  
720  
721  
722  
723  
724  
725  
726  
727  
728  
729  
730  
731  
732  
733  
734  
735  
736  
737  
738  
739  
740  
741  
742  
743  
744  
745  
746  
747  
748  
749  
750  
751  
752  
753  
754  
755  
756  
757  
758  
759  
760  
761  
762  
763  
764  
765  
766  
767  
768  
769  
770  
771  
772  
773  
774  
775  
776  
777  
778  
779  
780  
781  
782  
783  
784  
785  
786  
787  
788  
789  
790  
791  
792  
793  
794  
795  
796  
797  
798  
799  
800  
801  
802  
803  
804  
805  
806  
807  
808  
809  
810  
811  
812  
813  
814  
815  
816  
817  
818  
819  
820  
821  
822  
823  
824  
825  
826  
827  
828  
829  
830  
831  
832  
833  
834  
835  
836  
837  
838  
839  
840  
841  
842  
843  
844  
845  
846  
847  
848  
849  
850  
851  
852  
853  
854  
855  
856  
857  
858  
859  
860  
861  
862  
863  
864  
865  
866  
867  
868  
869  
870  
871  
872  
873  
874  
875  
876  
877  
878  
879  
880  
881  
882  
883  
884  
885  
886  
887  
888  
889  
890  
891  
892  
893  
894  
895  
896  
897  
898  
899  
900  
901  
902  
903  
904  
905  
906  
907  
908  
909  
910  
911  
912  
913  
914  
915  
916  
917  
918  
919  
920  
921  
922  
923  
924  
925  
926  
927  
928  
929  
930  
931  
932  
933  
934  
935  
936  
937  
938  
939  
940  
941  
942  
943  
944  
945  
946  
947  
948  
949  
950  
951  
952  
953  
954  
955  
956  
957  
958  
959  
960  
961  
962  
963  
964  
965  
966  
967  
968  
969  
970  
971  
972  
973  
974  
975  
976  
977  
978  
979  
980  
981  
982  
983  
984  
985  
986  
987  
988  
989  
990  
991  
992  
993  
994  
995  
996  
997  
998  
999  
1000

Currently, UK guidelines from the National Health Service (NHS) England[17] and the National Institute for Health and Care Excellence (NICE)[3] vaguely state that haemodialysis (HD) patients 'must have access to' psychosocial services, without clarifying the type and number of staff that should be accessible. This, and the large variety in models of service provision found, reflects a lack of empirical studies on the delivery of psychosocial services that can inform evidence-based staffing standards and regulations. This paper presents the findings of an investigation that used the concept of distress – broadly defined as 'a multifactorial unpleasant experience of a psychological (i.e., cognitive, behavioural, emotional), social,

1  
2  
3 spiritual, and/or physical nature'[18] – to explore the association between ICHD patient's  
4 distress, their perceived need for support and UK models of renal psychosocial service  
5 delivery. Studies have found that distress can have a negative effect on quality of life, health  
6 outcomes and costs, emphasising the importance of addressing psychosocial issues in renal  
7 patients[19–21]. The research question asked whether there is a relationship between  
8 different UK models of renal psychosocial service delivery, self-reported distress and need for  
9 support of ICHD patients. This investigation forms part of a larger, nationwide mixed-methods  
10 study that aims to understand how renal psychosocial services are delivered in the UK.  
11  
12  
13  
14  
15  
16  
17  
18

## 19 **METHODS**

### 20 **Participating renal units**

21  
22  
23  
24 The study used a cross-sectional survey design and included ICHD patients from seven main  
25 renal units across England (n=3), Wales (n=2) and Scotland (n=2). The sites were purposively  
26 selected out of a total of 89 renal units, informed by the outcomes of a recent renal  
27 psychosocial workforce mapping[15], to ensure an inclusion of different staffing ratios and  
28 models of psychosocial service provision. Ratios were determined based on the number of  
29 ICHD patients from the latest UK Renal Registry[4]. Whilst many members of psychosocial  
30 staff cover the whole range of RRT patients, including transplant patients, this number was  
31 most appropriate since it links directly to the study population. To obtain a numerical value  
32 for ratios suitable for comparisons and analysis, the Full-Time Equivalent (FTE) of psychosocial  
33 staff was divided by the number of ICHD patients in that unit, multiplied by 100. For example,  
34 1 FTE social work per 100 patients would equate to a ratio of 1. Throughout this paper, the  
35 units have been sorted based on their psychosocial staff-to-ICHD patient ratios, with unit A  
36 having no renal dedicated psychosocial staff available and unit G having the highest ratio of  
37 total psychosocial staff available to its patients. To protect the anonymity of the participating  
38 renal units, exact characteristics that could lead to identification cannot be provided. Instead,  
39 table 1 provides an overview of indicators of unit size, in addition to the psychosocial  
40 provision model. As can be seen, all units have different models of psychosocial service  
41 provision, apart from unit F and G, who differ in their staff-to-patient ratios.  
42  
43  
44  
45  
46  
47  
48  
49  
50  
51  
52  
53  
54  
55  
56  
57  
58  
59  
60

Table 1 Characteristics of participating renal units

| Unit Name | No. ICHD patients | No. RRT patients | No. satellite units | Psychosocial staffing model           |
|-----------|-------------------|------------------|---------------------|---------------------------------------|
| Unit A    | 0-250             | 501-750          | 6-8                 | No dedicated staff                    |
| Unit B    | 251-500           | 1001-1250        | 3-5                 | Psychology                            |
| Unit C    | 251-500           | 1001-1250        | 3-5                 | Counselling and welfare advice        |
| Unit D    | 251-500           | 751-1000         | 3-5                 | Psychology, counselling & social work |
| Unit E    | 251-500           | 751-1000         | 3-5                 | Social work & psychiatry              |
| Unit F    | 0-250             | 251-500          | 0-2                 | Psychology & social work              |
| Unit G    | 0-250             | 0-250            | 0-2                 | Psychology & social work              |

On average, ratios of renal dedicated psychosocial staffing in the study sites are better than ratios found across the UK. The average ratio of psychologists in this study is 1 Full-Time Equivalent (FTE) per 248 dialysis patients, compared to an average of 1 FTE per 1044 patients. For social workers, the average ratio in this study is 1 FTE per 156 dialysis patients, compared to 1 FTE per 355 patients across the UK[15]. Comparison of overall staffing ratios was not possible due to a lack of comparable data. Furthermore, only units B and D had a black and minority ethnic (BAME) population of a similar size as the overall UK dialysis population, whilst the other units served predominantly or completely white populations.

### Patients and public involvement

The study design was developed with input from patient representatives, who were asked to comment on the appropriateness of the outcome measures and provide insight into the expected burden and time required for participation. Patients were not involved in the recruitment or further conduct of the study. The results will be disseminated to participants and the wider renal units through Kidney Care UK's (KCUK) marketing channels (website, posters) at the end of the project.

### Participants and recruitment

All adult ICHD patients who could understand English, and with capacity (as determined by the nurse in charge), were eligible to participate in the study. Data collection took place between March 2018 and July 2019. Renal unit staff at each Trust provided all eligible patients with a letter of invitation and an information sheet. The University research team would visit the unit one week later to distribute the questionnaires (with information sheets), which were to be completed by patients whilst on dialysis. Consent was assumed upon return of the

completed questionnaire. To prevent selection bias, patients were allowed help with completion of the questionnaire.

### Sample

The sample size was restricted by the number of patients dialysing in the renal units. In total, 752 patients were on dialysis in the participating centres on the days of data collection. Of these, 509 completed the questionnaire, resulting in an overall response rate of 67.7%. Non-participants either refused to participate, were asleep, did not feel well enough to participate, did not speak English or lacked capacity. The response rates in participating units varied from 49.0% in unit F to around 82.0% in units D and G.

As can be seen in Table 2 **Error! Reference source not found.**, the majority of respondents were male and aged over 70 years old. This distribution of gender is similar to the general UK ICHD population, which is reported to consist for 61.9% of males. The median age of the general ICHD population is 67.5 years[4]. The study sample was almost entirely made up of people from the white ethnic group, which is different from the total ICHD population, in which this group makes up around 70 percent of patients [4]. Furthermore, the majority of patients had been on dialysis for 6 months to three years, lived together with their partner or family and was retired.

Four respondents did not complete the Distress Thermometer (DT), whilst others did not provide information on other questions, leading to varying numbers of missing data. Instead of using listwise deletion, which would have resulted in the loss of important information on some analyses, pairwise deletion was used to maximise the available data on an analysis by analysis basis.

Table 2: Respondent characteristics and proportion per sub-group

| Characteristic                                  | N   | %    |
|-------------------------------------------------|-----|------|
| Total                                           | 509 | 100  |
| <i>Main unit (psychosocial model)</i>           |     |      |
| Unit A (no staff)                               | 64  | 12.6 |
| Unit B (psychology)                             | 65  | 12.8 |
| Unit C (counselling + welfare advise)           | 98  | 19.3 |
| Unit D (social work + psychology + counselling) | 73  | 14.3 |

|                                   |     |      |
|-----------------------------------|-----|------|
| Unit E (social work + psychiatry) | 104 | 20.4 |
| Unit F (social work + psychology) | 47  | 9.3  |
| Unit G (social work + psychology) | 58  | 11.4 |
| <i>Sex</i>                        |     |      |
| Male                              | 311 | 61.1 |
| Female                            | 192 | 37.7 |
| Missing                           | 6   | 1.2  |
| <i>Age Category</i>               |     |      |
| 18-39                             | 50  | 9.8  |
| 40-49                             | 51  | 10.0 |
| 50-59                             | 97  | 19.1 |
| 60-69                             | 104 | 20.4 |
| ≥70                               | 201 | 39.5 |
| Missing                           | 6   | 1.2  |
| <i>Ethnicity</i>                  |     |      |
| White                             | 460 | 90.4 |
| Other                             | 42  | 8.3  |
| Missing                           | 7   | 1.4  |
| <i>Time on Dialysis</i>           |     |      |
| <6 months                         | 87  | 17.1 |
| 6 months to 3 years               | 193 | 37.9 |
| 3 to 5 years                      | 91  | 17.9 |
| >5 years                          | 130 | 25.5 |
| Missing                           | 8   | 1.6  |
| <i>Living situation</i>           |     |      |
| Living alone                      | 147 | 29.7 |
| Living together                   | 349 | 70.3 |
| Missing                           | 13  | 2.6  |
| <i>Employment situation</i>       |     |      |
| Employed                          | 67  | 13.2 |
| Unemployed                        | 14  | 2.8  |

|                |     |      |
|----------------|-----|------|
| Unable to work | 183 | 36.0 |
| Retired        | 237 | 46.6 |
| Missing        | 8   | 1.6  |

## Ethical approval

Ethical approval was obtained from the University of Salford Ethics Committee, the West of Scotland Research Ethics Service and Health Research Authority in October 2017 (Ref 17/WS/0185). In addition, all Research and Development offices from the participating Trusts approved the study and confirmed their capability and capacity to host the research.

## Measurements

The questionnaire used the US National Comprehensive Cancer Network's DT and Problems Checklist[18] as the instrument to measure distress. Although initially developed to screen for distress in oncology patients, the DT has been validated for use in the UK renal population [22]. It is a simple one-item screening tool, designed to be part of health professionals' daily practice, which asks patients to rate their distress on a 11-point Likert scale from zero (nothing) to ten (extreme). For analysis, distress was examined through a binary variable of distress 'caseness', with DT scores of  $\geq 4$  denoting distress [18]. Studies using the DT in renal care are limited, but a meta-analysis of studies in oncology patients found a good balance between pooled sensitivity (0.81, 95% Confidence Interval (CI): 0.79–0.82) and pooled specificity (0.72, 95 % CI: 0.71–0.72) at the cut-off score of 4 when comparing the DT to other diagnostic tools, such as the Hospital Anxiety and Depression Scale and Beck's Depression Inventory [23]. However, for the current study, this is less relevant since the DT was not used to identify patients with diagnosable mood disorders, but to determine the prevalence of distress defined as 'an unpleasant emotional state' and allow for comparisons across units. Distress, here, does not unambiguously refer to the same concept [24].

Patients indicated which issues were causing them distress by ticking a box on the Problem Checklist. The questionnaire included further tick-box questions, with the options yes or no, to determine whether patients were currently in receipt of psychosocial support; and if not, whether they would like to receive this support. Information on sociodemographic



characteristics (sex, age, ethnicity, living situation and employment situation) was captured using closed questions.

### Data analysis methods

The prevalence of distress and 95% CIs were calculated using the cut-off score described in the measurements section. Univariate logistic regression was then applied to examine the associations between distress, study sites and demographic characteristics. Subsequently, multivariable logistic regression was used to identify whether study site, staffing ratios and further demographic variables served as predictors of distress. All variables were entered simultaneously. Finally, univariate logistic regression was used to investigate the perceived need for support and prevalence of problem types across the study sites. All analysis were conducted using Stata Statistical Software: Release 14.2 [25].

### RESULTS

Overall, a distress score of  $\geq 4$  was observed in 247 out of 505 respondents, indicating that 48.9% (95% CI: 44.5 – 53.4) of ICHD patients were experiencing some form of distress. Mild-to-moderate distress (DT score 4-6) was identified in 25.7% of patients (130 cases, 95% CI: 22.0-29.8). A DT score of  $\geq 7$  was observed for 117 cases, indicating that 23.2% of patients (95% CI: 19.6-27.1) across all study sites were experiencing severe distress.

Findings from univariate analyses (**Error! Reference source not found.3**) showed an association between distress and study site, with patients in units F and G less likely to be cases than in unit A, B and C. Further associations were found with age group and employment situation. Specifically, those aged 18-39, 40-49 and 50-59 and those patients who were unemployed or considered themselves unable to work were significantly more likely to be distressed than those aged 70 or above and retired.

Table 3. Summary of univariate logistic analyses for association between distress and demographic variables

| Variable             | Distress (DT $\geq 4$ )<br>% (n) | OR<br>[95% CI]      | P-value | LR Chi2                        |
|----------------------|----------------------------------|---------------------|---------|--------------------------------|
| Total (n=505)        | 48.9 (247)                       |                     |         |                                |
| Main unit<br>(n=505) |                                  |                     |         | $\chi^2 (6) = 15.05, p = .019$ |
| A                    | 56.3 (36)                        |                     | -       |                                |
| B                    | 56.3 (36)                        | 1.00<br>[0.50-2.01] | 1.00    |                                |

|                             |            |                     |       |                               |
|-----------------------------|------------|---------------------|-------|-------------------------------|
| C                           | 59.2 (58)  | 1.13<br>[0.60-2.14] | .712  |                               |
| D                           | 48.0 (35)  | 0.72<br>[0.37-1.41] | .332  |                               |
| E                           | 43.3 (45)  | 0.59<br>[0.32-1.11] | .103  |                               |
| F                           | 34.1 (15)  | 0.40<br>[0.18-0.89] | .025  |                               |
| G                           | 37.9 (22)  | 0.48<br>[0.23-0.98] | .044  |                               |
| Sex<br>(n=499)              |            |                     |       | $\chi^2(1) = 2.23, p = .135$  |
| Male                        | 46.3 (143) |                     |       |                               |
| Female                      | 53.2 (101) | 1.32<br>[0.92-1.89] | .136  |                               |
| Age Category<br>(n=499)     |            |                     |       | $\chi^2(4) = 22.36, p < .001$ |
| 18-39                       | 60.0 (30)  | 2.46<br>[1.30-4.64] | .005  |                               |
| 40-49                       | 62.0 (31)  | 2.68<br>[1.41-5.07] | .003  |                               |
| 50-59                       | 61.9 (60)  | 2.66<br>[1.61-4.39] | <.001 |                               |
| 60-69                       | 47.1 (49)  | 1.46<br>[0.90-2.36] | .122  |                               |
| ≥70                         | 37.9 (75)  |                     | -     |                               |
| Ethnicity<br>(n=498)        |            |                     |       | $\chi^2(1) = 1.22, p = .269$  |
| White                       | 48.3 (220) |                     | -     |                               |
| Other                       | 57.1 (24)  | 1.43<br>[0.76-2.71] | .272  |                               |
| Time on Dialysis<br>(n=497) |            |                     |       | $\chi^2(3) = 2.99, p = .393$  |
| <6 months                   | 48.8 (42)  | 1.28<br>[0.74-2.22] | .371  |                               |
| 6 months to 3 years         | 52.1 (100) | 1.46<br>[0.93-2.30] | .097  |                               |
| 3 to 5 years                | 51.1 (46)  | 1.40<br>[0.82-2.42] | .216  |                               |
| >5 years                    | 42.6 (55)  |                     | -     |                               |
| Living situation<br>(n=492) |            |                     |       | $\chi^2(1) = 1.00, p = .316$  |
| Living alone                | 52.1 (76)  |                     | -     |                               |
| Living together             | 47.1 (163) | 0.82<br>[0.56-1.21] | .316  |                               |

|                              |            |                      |       |                               |
|------------------------------|------------|----------------------|-------|-------------------------------|
| Employment situation (n=497) |            |                      |       | $\chi^2(3) = 26.17, p < .001$ |
| Employed                     | 42.4 (28)  | 1.14<br>[0.65-1.98]  | .649  |                               |
| Unemployed                   | 78.6 (11)  | 5.65<br>[1.54-20.83] | .009  |                               |
| Unable to work               | 61.2 (112) | 2.43<br>[1.64-3.62]  | <.001 |                               |
| Retired                      | 39.3 (92)  |                      | -     |                               |

DT: Distress Thermometer; OR: Odds Ratio; 95% CI: 95% confidence interval, LR: Likelihood Ratio.

A multivariable logistic regression model (**Error! Reference source not found.**4) including renal unit and other demographic variables sex, age, ethnicity, time on dialysis, living situation and employment situation was found to be a significant predictor of distress (Likelihood Ratio (LR)  $\chi^2(19) = 56.77, p < .001$ ). The renal unit that patients belonged to significantly predicted distress, with being a patient in unit E ( $\beta -0.718$ ) or F ( $\beta -1.083$ ) significantly reducing the likelihood of distress compared to being a patient in unit A. Time on dialysis was also found to be a predictor of distress, with being on dialysis for a period of 3 to 5 years significantly increasing the likelihood of distress. Age group and employment situation were not found to be predictors.

Table 4: Multivariable regression model for predictors of distress including renal unit and demographic variables

| Predictor  | B (se)           | OR [95% CI]       | p    |
|------------|------------------|-------------------|------|
| Constant   | 0.176 (0.348)    |                   |      |
| Renal unit |                  |                   |      |
| A          | <i>reference</i> |                   |      |
| B          | -0.161 (0.387)   | 0.851 [0.40-1.82] | .676 |
| C          | 0.176 (0.348)    | 1.193 [0.60-2.36] | .612 |
| D          | -0.411 (0.375)   | 0.663 [0.32-1.38] | .272 |
| E          | -0.718 (0.351)   | 0.488 [0.25-0.97] | .041 |
| F          | -1.083 (0.461)   | 0.338 [0.14-0.84] | .019 |
| G          | -0.678 (0.395)   | 0.508 [0.23-1.10] | .086 |
| Sex        |                  |                   |      |
| Male       | <i>reference</i> |                   |      |
| Female     | 0.237 (0.202)    | 1.268 [0.85-1.89] | .241 |

|                       |                  |                    |      |  |
|-----------------------|------------------|--------------------|------|--|
| Age Category          |                  |                    |      |  |
| 18-39                 | 0.782 (0.444)    | 2.186 [0.92-5.22]  | .078 |  |
| 40-49                 | 0.776 (0.439)    | 2.173 [0.92-5.13]  | .077 |  |
| 50-59                 | 0.593 (0.369)    | 1.809 [0.89-3.73]  | .108 |  |
| 60-69                 | 0.164 (0.282)    | 1.179 [0.68-2.05]  | .560 |  |
| ≥70                   | <i>reference</i> |                    |      |  |
| Ethnicity             |                  |                    |      |  |
| White                 | <i>reference</i> |                    |      |  |
| Other                 | 0.0366 (0.388)   | 1.037 [0.48-2.22]  | .925 |  |
| Time on Dialysis      |                  |                    |      |  |
| <6 months             | 0.411 (0.309)    | 1.509 [0.82-2.77]  | .183 |  |
| 6 months to 3 years   | 0.360 (0.249)    | 1.434 [0.88-2.34]  | .149 |  |
| 3 to 5 years          | 0.606 (0.305)    | 1.833 [1.01-3.34]  | .047 |  |
| >5 years              | <i>reference</i> |                    |      |  |
| Living situation      |                  |                    |      |  |
| Living alone          | <i>reference</i> |                    |      |  |
| Living together       | -0.321 (0.215)   | 0.725 [0.48-1.10]  | .134 |  |
| Employment situation  |                  |                    |      |  |
| Employed/in Education | -0.511 (0.394)   | 0.560 [0.28-1.30]  | .194 |  |
| Unemployed            | 1.401 (0.769)    | 4.058 [0.90-18.33] | .069 |  |
| Unable to work        | 0.583 (0.311)    | 1.791 [0.97-3.30]  | .061 |  |
| Retired               | <i>reference</i> |                    |      |  |
| N                     | 488              |                    |      |  |

Further regression analysis was undertaken to provide more insight into the relationship between distress and psychosocial staffing ratios. Three similar multivariable logistic regression models were created, differing only by inclusion of either the total ratio of renal dedicated psychosocial staff, the ratio of renal social workers or the ratio of renal psychologists/counsellors (**Error! Reference source not found.5**). The difference between psychologists and counsellors should be acknowledged and emphasised, yet it was decided to group these professions together in model 3 so that counselling staff (only present in 2

units) could be taken into account. In the units that had renal social work available, ratios varied from 0.39 to 1.39. The variation in ratios for psychologists/counsellors was less; the ratios varied from 0.38 to 0.86. All models included the demographics sex, ethnicity, age, living situation, time on dialysis and employment situation as predictors.

The results were as follows:

- Model 1 (including total ratios of psychosocial staff): a collective significant effect was found, LR  $\chi^2$  (14)=47.68,  $p < .001$ . Specifically, the ratio of total psychosocial staff was found to significantly predict distress, with higher ratios of staff leading to a lower likelihood of distress ( $\beta$  -.43,  $p = .008$ ).
- Model 2 (including ratios of social work staff): This model also returned a significant result, predicting distress LR  $\chi^2$  (14) = 52.57,  $p < .001$ . A significant association was found between social worker ratios and distress, with likelihood of distress reducing as social worker ratios increased ( $\beta$  -.71,  $p = .001$ ).
- Model 3 (including ratios of psychology/counselling staff): Overall, the model significantly predicted distress, LR  $\chi^2$  (14) = 40.60,  $p < .001$ , but the ratio of psychology/counselling staff was not found to be a significant predictor ( $\beta$  -.13,  $p = .706$ ). To note, a model including psychology ratios only showed similar, non-significant results.

Table 5 Multivariable logistic regression models for predictors of distress including staff ratios and demographic variables

| Predictor                | Model 1       |                  |      | Model 2       |                  |      | Model 3       |                   |      |
|--------------------------|---------------|------------------|------|---------------|------------------|------|---------------|-------------------|------|
|                          | B (se)        | OR [95% CI]      | p    | B (se)        | OR [95% CI]      | p    | B (se)        | OR [95% CI]       | p    |
| Constant                 | -0.37 (0.32)  |                  |      | -0.41 (0.29)  |                  |      | -0.76 (0.30)  |                   |      |
| Ratios                   |               |                  |      |               |                  |      |               |                   |      |
| Total psychosocial staff | -0.429 (0.16) | 0.65 [0.47-0.89] | .008 |               |                  |      |               |                   |      |
| Social work              |               |                  |      | -0.706 (0.21) | 0.49 [0.33-0.74] | .001 |               |                   |      |
| Psychology/counselling   |               |                  |      |               |                  |      | -0.126 (0.35) | 0.878 [0.45-1.73] | .718 |
| Sex                      |               |                  |      |               |                  |      |               |                   |      |
| Male <i>reference</i>    |               |                  |      |               |                  |      |               |                   |      |
| Female                   | 0.176         | 1.19             | .379 | 0.199         | 1.22             | .319 | 0.192         | 1.211             | .335 |

|                          |                  |                     |      |                  |                      |      |                  |                      |      |
|--------------------------|------------------|---------------------|------|------------------|----------------------|------|------------------|----------------------|------|
|                          | (0.120)          | [0.81-1.76]         |      | (0.20)           | [0.83-1.80]          |      | (0.20)           | [0.82-1.79]          |      |
| Age Category             |                  |                     |      |                  |                      |      |                  |                      |      |
| 18-39                    | 0.759<br>(0.44)  | 2.14<br>[0.91-5.04] | .083 | 0.787<br>(0.44)  | 2.20<br>[0.93-5.21]  | .074 | 0.700<br>(0.43)  | 2.01<br>[0.86-4.72]  | .107 |
| 40-49                    | 0.747<br>(0.43)  | 2.11<br>[0.91-4.92] | .084 | 0.763<br>(0.43)  | 2.15<br>[0.92-5.02]  | .078 | 0.796<br>(0.43)  | 2.22<br>[0.95-5.15]  | .064 |
| 50-59                    | 0.600<br>(0.36)  | 1.83<br>[0.90-3.72] | .096 | 0.588<br>(0.36)  | 1.801<br>[0.88-3.67] | .105 | 0.665<br>(0.36)  | 1.946<br>[0.96-3.95] | .065 |
| 60-69                    | 0.186<br>(0.28)  | 1.20<br>[0.70-2.08] | .504 | 0.191<br>(0.28)  | 1.210<br>[0.70-2.09] | .494 | 0.202<br>(0.28)  | 1.224<br>[0.71-2.10] | .464 |
| ≥70 <i>reference</i>     |                  |                     |      |                  |                      |      |                  |                      |      |
| Ethnicity                |                  |                     |      |                  |                      |      |                  |                      |      |
| White <i>reference</i>   |                  |                     |      |                  |                      |      |                  |                      |      |
| Other                    | -0.069<br>(0.38) | 0.94<br>[0.45-1.96] | .859 | -0.051<br>(0.38) | 0.95<br>[0.45-2.00]  | .892 | 0.004<br>(0.38)  | 1.01<br>[0.48-2.10]  | .991 |
| Time on Dialysis         |                  |                     |      |                  |                      |      |                  |                      |      |
| <6 mths                  | 0.456<br>(0.31)  | 1.58<br>[0.87-2.87] | .137 | 0.412<br>(0.31)  | 1.51<br>[0.83-2.75]  | .180 | 0.521<br>(0.30)  | 1.68<br>[0.93-3.05]  | .086 |
| 6 mths to 3 yrs          | 0.388<br>(0.25)  | 1.47<br>[0.91-2.39] | .119 | 0.374<br>(0.25)  | 1.45<br>[0.89-2.36]  | .131 | 0.445<br>(0.25)  | 1.56<br>[0.96-2.52]  | .070 |
| 3 to 5 yrs               | 0.624<br>(0.30)  | 1.87<br>[1.04-3.37] | .037 | 0.618<br>(0.30)  | 1.86<br>[1.02-3.35]  | .041 | 0.648<br>(0.30)  | 1.91<br>[1.09-3.42]  | .029 |
| >5 yrs <i>reference</i>  |                  |                     |      |                  |                      |      |                  |                      |      |
| Living situation         |                  |                     |      |                  |                      |      |                  |                      |      |
| Alone <i>reference</i>   |                  |                     |      |                  |                      |      |                  |                      |      |
| Together                 | -0.267<br>(0.21) | 0.77<br>[0.51-1.16] | .206 | -0.291<br>(0.21) | 0.75<br>[0.49-1.13]  | .167 | -0.258<br>(0.21) | 0.77<br>[0.51-1.16]  | .217 |
| Employment               |                  |                     |      |                  |                      |      |                  |                      |      |
| Employed                 | -0.506<br>(0.39) | 0.61<br>[0.28-1.29] | .190 | -0.509<br>(0.39) | 0.61<br>[0.28-1.29]  | .190 | -0.450<br>(0.39) | 0.64<br>[0.30-1.36]  | .244 |
| Unemployed               | 1.248<br>(0.76)  | 3.49<br>[0.79-15.5] | .100 | 1.323<br>(0.76)  | 3.76<br>[0.84-16.8]  | .084 | 1.227<br>(0.76)  | 3.41<br>[0.77-15.1]  | .106 |
| Unable to work           | 0.520<br>(0.30)  | 1.68<br>[0.93-3.04] | .088 | 0.534<br>(0.30)  | 1.71<br>[0.94-3.10]  | .080 | 0.492<br>(0.30)  | 1.64<br>[0.90-2.95]  | .104 |
| Retired <i>reference</i> |                  |                     |      |                  |                      |      |                  |                      |      |
| N                        | 488              |                     | 488  |                  |                      | 488  |                  |                      |      |

One or more practical issues (such as problems related to finances or housing) were reported by 43.4% of patients; 60.9% reported one or more emotional issues (such as depression or fears). It was found that 17.6% of respondents wanted to receive psychosocial support for their problems, but were not currently receiving any. Univariate analysis indicated that there were differences across units ( $\chi^2(6) = 37.80, p < .001$ ), with patients in units C, D, E, F and G significantly less likely to report an unmet need for support than patients in unit A and B (**Error! Reference source not found.**6). Of the people that reported a need for support, 75.9% were classed as distressed.

Table 6: Univariate logistic analysis of patients reporting a perceived unmet need for support per study site

| Unit          | % Unmet need for support (n) | OR [95% CI]        | <i>p</i> |
|---------------|------------------------------|--------------------|----------|
| Total (n=499) | 17.6 (88)                    |                    |          |
| A             | 35.5 (22)                    |                    |          |
| B             | 35.4 (23)                    | 0.996 [0.48-2.06]  | .991     |
| C             | 12.5 (12)                    | 0.260 [0.12-0.58]  | .001     |
| D             | 16.9 (12)                    | 0.370 [0.17-0.83]  | .016     |
| E             | 8.7 (9)                      | 0.172 [0.073-0.41] | <.001    |
| F             | 13.9 (6)                     | 0.295 [0.11-0.81]  | .017     |
| G             | 6.9 (4)                      | 0.135 [0.043-0.42] | .001     |

## DISCUSSION

### Main findings

It was found that almost half (48.9%, 95% CI: 44.5 – 53.4) of all ICHD patients participating in this study experienced some form of distress, indicating the need for psychosocial support and services. In general, our results suggest that there is a significant relationship between the different UK models of renal psychosocial service delivery and ICHD patient distress. An association between distress and models of psychosocial service provision was found and the results indicated that psychosocial staff-to-patient ratios significantly predict distress in patients. Specifically, patients in units with higher total psychosocial staff ratios and higher social work ratios were less likely to experience distress, even after controlling for their sex, age, ethnicity, time on dialysis, living situation and employment status. Furthermore, differences across units were found in patients reported unmet need for support, with patients in units with both practical (as provided by a social worker/welfare advisor) and emotional support (from a psychologist/counsellor) available significantly less likely to want (additional) support.

### Strengths and limitations

1  
2  
3 The key limitation of this study is its cross-sectional nature. A longitudinal panel study that  
4 would measure patient's distress levels before and after receiving certain psychosocial  
5 services (or no such services) would have had a higher internal validity, however, such study  
6 was not possible for practical reasons. Due to the selection of study sites based on  
7 psychosocial service provision models, the average psychosocial staffing ratios in this study  
8 were higher than the overall UK renal psychosocial staffing ratios. Based on our findings, this  
9 suggests that generalising these results to the whole ICHD population could underestimate  
10 overall distress prevalence. Importantly, one of the strengths of this study is the high response  
11 rate. Even the lowest response rate (in unit F) was still relatively high (49%), although  
12 variability between the units was found. There is however no indication that response rate  
13 variability affected the results, with the highest (unit G) and lowest (unit F) response rates  
14 showing the lowest distress prevalence. Of relevance for the aim of exploring distress across  
15 different models of service provision, this increases the probability that the scores are  
16 representative of the patients in the participating units. To our knowledge, this is the first UK  
17 study to show an impact of renal social worker staffing levels on patient distress. This is not  
18 to say that renal psychologists and counsellors do not impact patient distress levels. The ratios  
19 of psychological staff were much more equal across units than the social work ratios, which  
20 could have contributed to the current findings. Further research could explore distress across  
21 units that have notable differences in psychology staffing levels. Due to a lack of available  
22 data, it was not possible to examine the current findings in the wider, unit-specific context,  
23 including factors such as patients' access and use of general psychosocial services in the  
24 hospital or community. However, in-depth qualitative research was completed with renal  
25 staff to explore the wider process of psychosocial service delivery in each study site in a linked  
26 component of this study (findings to be reported elsewhere).

### 47 **Implications**

48  
49  
50 This is the first study to explore distress in ICHD patients across different models of renal  
51 psychosocial service provision. Whilst the overall prevalence of distress was in line with  
52 estimates from other studies that used self-reported measures for depression and anxiety  
53 [9,20], it is the difference in prevalence across units that is of importance. Associations  
54 between distress and demographic variables have been widely reported in other studies  
55 [26,27], however our results show that after accounting for models of service provision, other



1  
2  
3 demographic factors (apart from time on dialysis) do not emerge as significant predictors of  
4 distress. This finding contradicts recently published findings by Damery, Braun, Sein, et al.  
5 who reported no influence of service delivery models on distress in their study[26]. There are  
6 a couple of possible explanations for this discrepancy: firstly, Damery et al. only compared  
7 the prevalence of mild-to moderate distress, leaving the prevalence of severe distress out of  
8 their analysis and excluding patients using psychiatric services since CKD stage 5 from  
9 participation. In the context of psychosocial service delivery, the current study took all levels  
10 of distress into account and did not exclude those who were already receiving support.  
11 Secondly, whilst Damery et al. did not report staff-to-patient ratios, only renal psychologists  
12 are mentioned, which appears to reflect little variation in models of service provision across  
13 the participating units. Any differences in staffing levels might have been too small to result  
14 in differences in patient distress. Finally, there was no mention of the presence of renal social  
15 workers, whose availability plays an important role in reducing patient distress, according to  
16 the current findings.  
17  
18  
19  
20  
21  
22  
23  
24  
25  
26  
27  
28  
29

30 The findings of this study are relevant for policy makers and practitioners in allocating  
31 resources to the management of distress in renal patients and in the wider context of  
32 psychosocial service delivery for those with long-term conditions. Not only does the evidence  
33 presented here show that renal psychosocial staff play a role in reducing patient distress, the  
34 results also highlight a higher patient-reported need for these services in hospitals where  
35 psychosocial staffing numbers are low or non-existent. This is in line with Damery et al. who  
36 found higher levels of need in units without renal psychologists available, compared to those  
37 with renal psychologists available[26]. Yet, psychosocial services have steadily reduced over  
38 the last years [16], leaving patients having to look for support from services provided in the  
39 community. The results could indicate that these services are inaccessible or unable to  
40 provide the support patients need, leading to higher distress. Further research is needed to  
41 explore whether this is the case for the whole dialysis population, including patients on home  
42 haemodialysis and peritoneal dialysis.  
43  
44  
45  
46  
47  
48  
49  
50  
51  
52  
53  
54

55 Symptoms of distress can have a negative effect on patient quality of life, medical outcomes  
56 and costs, through reduced treatment-adherence and increased rates of mortality,  
57 hospitalisation and length of hospital stay [19–21]. Therefore, the findings emphasise a need  
58  
59  
60

1  
2  
3 for increased numbers of integrated psychosocial staff and a renal psychosocial care pathway,  
4 which, importantly, should include practical as well as emotional support. However, the main  
5 challenge to implementing psychosocial support is the lack of robust evidence to indicate  
6 adequate psychosocial staffing levels. Whilst further investigation into appropriate staffing  
7 levels is necessary and the wider number of patients on all treatment modalities should be  
8 taken into account to determine these, the findings provide a first indication of the minimum  
9 ratios of psychosocial staff required. The first participating unit with a dedicated social worker  
10 to have significantly lower distress levels than a unit without any support, had a staffing ratio  
11 of 1 social worker per 142 ICHD patients; the staffing ratio in the first unit with a dedicated  
12 psychologist to have significantly lower distress levels was 1 psychologist per 532 ICHD  
13 patients. For social work, this is still much higher than recommended staffing ratios of 1 full-  
14 time worker per 70 HD patients, to allow access to both routine and complex social work  
15 support for each patient as they move along the renal pathway. A further challenge to the  
16 implementation of renal psychosocial services is ensuring that access to these services is  
17 equitable across the country, not just based on a postcode lottery. This study highlighted  
18 geographical differences in distress prevalence, related to access to renal dedicated  
19 psychosocial services. In addition, it is important to consider the role that dialysis staff play in  
20 the process of delivering psychosocial services. There is the expectation that dialysis staff  
21 support patients who experience lower-level distress [28] and psychosocial staff are often  
22 dependent on dialysis staff to inform, identify and refer patients in need for support to their  
23 service. Yet, a recent study by Combes et al. [29] found that dialysis staff experience  
24 significant barriers in identifying and responding to distress, related to skills and knowledge,  
25 but also role perceptions.

26  
27  
28  
29  
30  
31  
32  
33  
34  
35  
36  
37  
38  
39  
40  
41  
42  
43  
44  
45  
46 To relieve some of the dependence on dialysis staff, screening patients for distress could be  
47 another way to identify patients in need. It is essential that the focus of this screening is not  
48 only on detecting clinically significant distress that could warrant a psychological intervention.  
49 Instead, for it to identify patients that could benefit from any type of psychosocial service,  
50 screening processes should bring patients to light who are experiencing distress, in the wider  
51 sense of the word, and/or psychosocial issues. For example, practical problems (such as issues  
52 with social care or transport) would not necessarily make a patient report distress that would  
53 meet the criteria for a formal diagnosis of anxiety or depression. Yet, in order to solve these  
54  
55  
56  
57  
58  
59  
60

1  
2  
3 problems and prevent them from contributing to negative health outcomes, a patient might  
4 still require support from a social worker. The use of the DT and Problem Checklist, already  
5 recommended in US oncology care guidelines [18], would allow for such a wide approach to  
6 screening and has been found to be an acceptable tool in the renal population [22]. Still, even  
7 with this wide approach to capturing distress, our results show that it cannot be assumed that  
8 distress equals need for support. As such, any screening tool should always include a question  
9 that captures a patient-reported need and want for psychosocial services.  
10  
11

12  
13  
14  
15  
16 In conclusion, our findings support the incorporation of dedicated psychosocial support in the  
17 renal care pathway. At a time of calls for the evaluation and restructuring of CKD care models  
18 to improve outcomes and reduce the costs of care, the need for true integration of renal  
19 psychosocial services in new models of care can no longer be ignored.  
20  
21  
22  
23

#### 24 **ACKNOWLEDGEMENTS**

25  
26  
27 We would like to thank the staff and patients of the participating renal units for their  
28 assistance and participation.  
29  
30

#### 31 **COMPETING INTERESTS**

32  
33  
34 The authors report a grant from KCUK during the conduct of the study. PO also discloses  
35 personal fees from Baxter International and grants from KCUK, Kidney Research UK,  
36 National Institute of Health Research, and the British Renal Society, outside the submitted  
37 work.  
38  
39  
40

#### 41 **FUNDING**

42  
43  
44 This work is part of a larger Industrial Case PhD Studentship, co-funded by KCUK and the  
45 Higher Education Innovation Fund. KCUK identified the focus of the study, but had no  
46 involvement in the data collection, analysis or writing of this manuscript.  
47  
48  
49

#### 50 **AUTHORS' CONTRIBUTIONS**

51  
52  
53 MS and PO were involved in the design and data collection. MS and DK designed a data  
54 analysis plan and MS undertook the data analysis under supervision and support from DK.  
55 MS drafted the manuscript under supervision from PO and DK, who both completed  
56  
57  
58  
59  
60

1  
2  
3 revisions. All authors provided intellectual content of critical importance to the work  
4 described and have read and approved the final manuscript.  
5  
6

#### 7 **DATA SHARING STATEMENT**

8  
9  
10 The dataset used during the current study is available from the corresponding author on  
11 reasonable request after completion of the wider project.  
12  
13

#### 14 **REFERENCES**

- 15  
16  
17 1 Jha V, Garcia-Garcia G, Iseki K, *et al.* Chronic kidney disease: global dimension and  
18 perspectives. *Lancet* 2013;**382**:260–72. doi:10.1016/S0140-6736(13)60687-X  
19  
20  
21 2 Jansen DL. *Living with Chronic Kidney Disease The role of illness perceptions ,*  
22 *treatment perceptions and social support.*  
23  
24 2012. <https://dspace.library.uu.nl/handle/1874/236030> (accessed 25 May 2018).  
25  
26  
27 3 National Institute for Health and Care Excellence. Chronic kidney disease in adults.  
28 NICE 2017. <https://www.nice.org.uk/guidance/qs5> (accessed 11 Dec 2017).  
29  
30  
31 4 UK Renal Registry. UK Renal Registry 21st Annual Report - data to 31/12/2017. Bristol,  
32 UK: 2019. <https://www.renalreg.org/publications-reports/>  
33  
34  
35  
36 5 Bayliss EA, Bhardwaja B, Ross C, *et al.* Multidisciplinary team care may slow the rate  
37 of decline in renal function. *Clin J Am Soc Nephrol* 2011;**6**:704–10.  
38  
39 doi:10.2215/CJN.06610810  
40  
41  
42 6 Tonelli M, Wiebe N, Guthrie B, *et al.* Comorbidity as a driver of adverse outcomes in  
43 people with chronic kidney disease. *Kidney Int* 2015;**88**:859–66.  
44  
45  
46 doi:10.1038/ki.2015.228  
47  
48  
49 7 Kidney Health Advisory Group. Kidney Health: Delivering Excellence. 2013.  
50 [https://pkdcharity.org.uk/images/downloads/Kidney-Health-Delivering-](https://pkdcharity.org.uk/images/downloads/Kidney-Health-Delivering-Excellence.pdf)  
51 [Excellence.pdf](https://pkdcharity.org.uk/images/downloads/Kidney-Health-Delivering-Excellence.pdf) (accessed 11 Jun 2019).  
52  
53  
54 8 Sharif MU, Elsayed ME, Stack AG. The global nephrology workforce: Emerging threats  
55 and potential solutions! *Clin Kidney J.* 2016;**9**:11–22. doi:10.1093/ckj/sfv111  
56  
57  
58 9 Cukor D, Ver Halen N, Fruchter Y, *et al.* Psychosocial Issues in Chronic Kidney Disease  
59  
60

- 1  
2  
3 Patients. In: Kimmel PL, Rosenberg ME, eds. *Chronic Renal Disease*. Academic Press  
4 2015. 229–36. doi:10.1016/B978-0-12-411602-3.00019-6  
5  
6  
7  
8 10 Bello AK, Levin A, Manns BJ, *et al*. Effective CKD care in european countries:  
9 Challenges and opportunities for health policy. *Am J Kidney Dis* 2015;**65**:15–25.  
10 doi:10.1053/j.ajkd.2014.07.033  
11  
12  
13  
14 11 Bale C, Douglas A, Jegatheesan D, *et al*. Psychosocial Factors in End-Stage Kidney  
15 Disease Patients at a Tertiary Hospital in Australia. *Int J Nephrol* 2016;**2016**:1–6.  
16 doi:10.1155/2016/2051586  
17  
18  
19  
20 12 Campbell KL, Murray EM. Allied health services to nephrology: An audit of current  
21 workforce and meeting future challenges. *J Ren Care* 2013;**39**:52–61.  
22 doi:10.1111/j.1755-6686.2012.00330.x  
23  
24  
25  
26 13 Merighi JR, Zheng M, Browne T. Nephrology Social Workers' Caseloads and Hourly  
27 Wages in 2014 and 2017: Findings from the National Kidney Foundation Council of  
28 Nephrology Social Workers Professional Practice Survey. *Natl Kidney Found J Nephrol*  
29 *Soc Work* Published Online First: 2018.<http://education.kidney.org/JNSW-CE-Program>  
30 (accessed 14 Nov 2019).  
31  
32  
33  
34  
35  
36 14 Browne T, Merighi JR, Washington T, *et al*. Nephrology Social Work. In: *Handbook of*  
37 *Health Social Work*. Wiley 2019. 411–40. doi:10.1002/9781119420743.ch18  
38  
39  
40  
41 15 Seekles ML, Coyne E, Ormandy P, *et al*. The UK renal psychosocial workforce : a  
42 mapping exercise. 2018. <http://usir.salford.ac.uk/46906/> (accessed 10 Aug 2018).  
43  
44  
45 16 Seekles ML, Ormandy P, Coyne E. Mapping the UK renal psychosocial workforce: the  
46 first comprehensive workforce survey. *BMC Nephrol* 2019;**20**:100.  
47 doi:10.1186/s12882-019-1287-0  
48  
49  
50  
51 17 NHS England. Service specifications: In Centre Haemodialysis (ICHD): Main and  
52 Satellite units. 2017. [https://www.england.nhs.uk/commissioning/wp-](https://www.england.nhs.uk/commissioning/wp-content/uploads/sites/12/2015/01/a06-serv-spec-haemodialysis-ichd.pdf)  
53 [content/uploads/sites/12/2015/01/a06-serv-spec-haemodialysis-ichd.pdf](https://www.england.nhs.uk/commissioning/wp-content/uploads/sites/12/2015/01/a06-serv-spec-haemodialysis-ichd.pdf) (accessed  
54 11 Dec 2017).  
55  
56  
57  
58 18 Holland JC, Jacobsen PB, Riba MB. Distress management. In: *Cancer Control*. 2001.  
59  
60

- 1  
2  
3 88–93. doi:10.6004/jnccn.2007.0009  
4  
5  
6 19 Palmer S, Vecchio M, Craig JC, *et al.* Association between depression and death in  
7 people with CKD: A meta-analysis of cohort studies. *Am J Kidney Dis* 2013;**62**:493–  
8 505. doi:10.1053/j.ajkd.2013.02.369  
9  
10  
11  
12 20 Schouten RW, Haverkamp GL, Loosman WL, *et al.* Anxiety Symptoms, Mortality, and  
13 Hospitalization in Patients Receiving Maintenance Dialysis: A Cohort Study. *Am J*  
14 *Kidney Dis* 2019;**74**:158–66. doi:10.1053/j.ajkd.2019.02.017  
15  
16  
17  
18 21 Tsai YC, Chiu YW, Hung CC, *et al.* Association of symptoms of depression with  
19 progression of CKD. *Am J Kidney Dis* 2012;**60**:54–61. doi:10.1053/j.ajkd.2012.02.325  
20  
21  
22 22 Alston H, Vickerstaff V, Low J, *et al.* SP707 Validation of the Distress Thermometer in  
23 a UK renal population. *Nephrol Dial Transplant* 2015;**30**:iii612–iii612.  
24 doi:10.1093/ndt/gfv200.26  
25  
26  
27  
28 23 Ma X, Zhang J, Zhong W, *et al.* The diagnostic role of a short screening tool - The  
29 distress thermometer: A meta-analysis. *Support Care Cancer* 2014;**22**:1741–55.  
30 doi:10.1007/s00520-014-2143-1  
31  
32  
33  
34 24 Alston H. *Psychosocial Distress in Older Patients with Advanced Chronic Kidney*  
35 *Disease*. 2018. [https://discovery.ucl.ac.uk/id/eprint/10061352/1/Alston\\_\\_thesis.pdf](https://discovery.ucl.ac.uk/id/eprint/10061352/1/Alston__thesis.pdf)  
36 (accessed 10 Jun 2020).  
37  
38  
39  
40  
41 25 StataCorp. Stata Statistical Software: Release 14. College Station, TX: StataCorp LP.  
42 2015. 2015.  
43  
44  
45 26 Damery S, Brown C, Sein K, *et al.* The prevalence of mild-to-moderate distress in  
46 patients with end-stage renal disease: Results from a patient survey using the  
47 emotion thermometers in four hospital Trusts in the West Midlands, UK. *BMJ Open*  
48 2019;**9**. doi:10.1136/bmjopen-2018-027982  
49  
50  
51  
52  
53 27 Goh ZS, Griva K. Anxiety and depression in patients with end-stage renal disease:  
54 Impact and management challenges – A narrative review. *Int J Nephrol Renovasc Dis*.  
55 2018;**11**:93–102. doi:10.2147/IJNRD.S126615  
56  
57  
58  
59 28 National Renal Workforce Planning Group. The Renal Team A Multi-Professional  
60

1  
2  
3 Renal Workforce Plan For Adults and Children with Renal Disease. 2002.

4 www.britishrenal.org (accessed 2 Feb 2019).

- 5  
6  
7 29 Combes G, Damery S, Sein K, *et al.* Distress in patients with end-stage renal disease:  
8 Staff perceptions of barriers to the identification of mild-moderate distress and the  
9 provision of emotional support. *PLoS One* 2019;**14**:e0225269.  
10  
11 doi:10.1371/journal.pone.0225269  
12  
13  
14  
15  
16  
17  
18  
19  
20  
21  
22  
23  
24  
25  
26  
27  
28  
29  
30  
31  
32  
33  
34  
35  
36  
37  
38  
39  
40  
41  
42  
43  
44  
45  
46  
47  
48  
49  
50  
51  
52  
53  
54  
55  
56  
57  
58  
59  
60

For peer review only

**STROBE 2007 (v4) Statement—Checklist of items that should be included in reports of *cross-sectional studies***

| Section/Topic                | Item # | Recommendation                                                                                                                                                                       | Reported on page # |
|------------------------------|--------|--------------------------------------------------------------------------------------------------------------------------------------------------------------------------------------|--------------------|
| <b>Title and abstract</b>    | 1      | (a) Indicate the study's design with a commonly used term in the title or the abstract                                                                                               | 1                  |
|                              |        | (b) Provide in the abstract an informative and balanced summary of what was done and what was found                                                                                  | 2                  |
| <b>Introduction</b>          |        |                                                                                                                                                                                      |                    |
| Background/rationale         | 2      | Explain the scientific background and rationale for the investigation being reported                                                                                                 | 4                  |
| Objectives                   | 3      | State specific objectives, including any prespecified hypotheses                                                                                                                     | 5                  |
| <b>Methods</b>               |        |                                                                                                                                                                                      |                    |
| Study design                 | 4      | Present key elements of study design early in the paper                                                                                                                              | 5                  |
| Setting                      | 5      | Describe the setting, locations, and relevant dates, including periods of recruitment, exposure, follow-up, and data collection                                                      | 5                  |
| Participants                 | 6      | (a) Give the eligibility criteria, and the sources and methods of selection of participants                                                                                          | 6                  |
| Variables                    | 7      | Clearly define all outcomes, exposures, predictors, potential confounders, and effect modifiers. Give diagnostic criteria, if applicable                                             | 9                  |
| Data sources/<br>measurement | 8*     | For each variable of interest, give sources of data and details of methods of assessment (measurement). Describe comparability of assessment methods if there is more than one group | 9                  |
| Bias                         | 9      | Describe any efforts to address potential sources of bias                                                                                                                            | 7                  |
| Study size                   | 10     | Explain how the study size was arrived at                                                                                                                                            | 7                  |
| Quantitative variables       | 11     | Explain how quantitative variables were handled in the analyses. If applicable, describe which groupings were chosen and why                                                         | 9                  |
| Statistical methods          | 12     | (a) Describe all statistical methods, including those used to control for confounding                                                                                                | 9                  |
|                              |        | (b) Describe any methods used to examine subgroups and interactions                                                                                                                  | 9                  |
|                              |        | (c) Explain how missing data were addressed                                                                                                                                          | 7                  |
|                              |        | (d) If applicable, describe analytical methods taking account of sampling strategy                                                                                                   | n/a                |
|                              |        | (e) Describe any sensitivity analyses                                                                                                                                                | n/a                |
| <b>Results</b>               |        |                                                                                                                                                                                      |                    |



|                          |     |                                                                                                                                                                                                              |       |
|--------------------------|-----|--------------------------------------------------------------------------------------------------------------------------------------------------------------------------------------------------------------|-------|
| Participants             | 13* | (a) Report numbers of individuals at each stage of study—eg numbers potentially eligible, examined for eligibility, confirmed eligible, included in the study, completing follow-up, and analysed            | 7     |
|                          |     | (b) Give reasons for non-participation at each stage                                                                                                                                                         | -     |
|                          |     | (c) Consider use of a flow diagram                                                                                                                                                                           | -     |
| Descriptive data         | 14* | (a) Give characteristics of study participants (eg demographic, clinical, social) and information on exposures and potential confounders                                                                     | 8     |
|                          |     | (b) Indicate number of participants with missing data for each variable of interest                                                                                                                          | 8     |
| Outcome data             | 15* | Report numbers of outcome events or summary measures                                                                                                                                                         | 10    |
| Main results             | 16  | (a) Give unadjusted estimates and, if applicable, confounder-adjusted estimates and their precision (eg, 95% confidence interval). Make clear which confounders were adjusted for and why they were included | 10    |
|                          |     | (b) Report category boundaries when continuous variables were categorized                                                                                                                                    | 10    |
|                          |     | (c) If relevant, consider translating estimates of relative risk into absolute risk for a meaningful time period                                                                                             |       |
| Other analyses           | 17  | Report other analyses done—eg analyses of subgroups and interactions, and sensitivity analyses                                                                                                               | 12-15 |
| <b>Discussion</b>        |     |                                                                                                                                                                                                              |       |
| Key results              | 18  | Summarise key results with reference to study objectives                                                                                                                                                     | 16    |
| Limitations              | 19  | Discuss limitations of the study, taking into account sources of potential bias or imprecision. Discuss both direction and magnitude of any potential bias                                                   | 16    |
| Interpretation           | 20  | Give a cautious overall interpretation of results considering objectives, limitations, multiplicity of analyses, results from similar studies, and other relevant evidence                                   | 17    |
| Generalisability         | 21  | Discuss the generalisability (external validity) of the study results                                                                                                                                        | 16-17 |
| <b>Other information</b> |     |                                                                                                                                                                                                              |       |
| Funding                  | 22  | Give the source of funding and the role of the funders for the present study and, if applicable, for the original study on which the present article is based                                                | 19    |

\*Give information separately for cases and controls in case-control studies and, if applicable, for exposed and unexposed groups in cohort and cross-sectional studies.

**Note:** An Explanation and Elaboration article discusses each checklist item and gives methodological background and published examples of transparent reporting. The STROBE checklist is best used in conjunction with this article (freely available on the Web sites of PLoS Medicine at <http://www.plosmedicine.org/>, Annals of Internal Medicine at <http://www.annals.org/>, and Epidemiology at <http://www.epidem.com/>). Information on the STROBE Initiative is available at [www.strobe-statement.org](http://www.strobe-statement.org).
